# Supplementary material
Source: PubMed Central journal article supplement (PMC4721509)
Supplement: NIHMS741145-supplement-supplemental_table_1.pdf [file NIHMS741145-supplement-supplemental_table_1.pdf]

**Supplementary Table 1: List of all identified proteins and their relative quantitation (sorted by protein name)**

| Identified Proteins (582)                                     | Acc. No.    | Mol. W. | Seq. coverage | No. of unique peptides | Tag_114 | Tag_115 | Tag_116 | Tag_117 | Ratio (KO/Ctrl) | T-test  |
|---------------------------------------------------------------|-------------|---------|---------------|------------------------|---------|---------|---------|---------|-----------------|---------|
| 10 kDa heat shock protein, mitochondrial OS=Mus musculus GN=  | Q64433      | 11 kDa  | 61.00%        | 8                      | 1       | 1.0     | 1.0     | 1.1     | 1.1             | 0.42    |
| 14-3-3 protein beta/alpha OS=Mus musculus GN=Ywhab PE=1 S     | Q9CQV8 (+1) | 28 kDa  | 46.00%        | 5                      | 1       | 0.9     | 1.2     | 1.2     | 1.3             | 0.04    |
| 14-3-3 protein epsilon OS=Mus musculus GN=Ywhae PE=1 SV=1     | P62259      | 29 kDa  | 51.00%        | 10                     | 1       | 0.9     | 1.0     | 1.1     | 1.1             | 0.29    |
| 14-3-3 protein eta OS=Mus musculus GN=Ywhah PE=1 SV=2         | P68510      | 28 kDa  | 27.00%        | 2                      | 1       | 0.6     | 0.8     | 0.8     | 1.0             | 0.98    |
| 14-3-3 protein gamma OS=Mus musculus GN=Ywhag PE=1 SV=2       | P61982      | 28 kDa  | 58.00%        | 13                     | 1       | 1.0     | 1.0     | 1.1     | 1.1             | 0.42    |
| 14-3-3 protein zeta/delta OS=Mus musculus GN=Ywhaz PE=1 SV    | P63101      | 28 kDa  | 44.00%        | 5                      | 1       | 0.9     | 1.1     | 1.1     | 1.2             | 0.03    |
| 2,4-dienoyl-CoA reductase, mitochondrial OS=Mus musculus GN   | Q9CQ62      | 36 kDa  | 35.00%        | 9                      | 1       | 1.0     | 1.0     | 1.1     | 1.0             | 0.42    |
| 26S protease regulatory subunit 6A OS=Mus musculus GN=Psmc    | A2AGN7 (+2) | 45 kDa  | 6.80%         | 2                      | 1       | #VALUE! | #VALUE! | #VALUE! | #VALUE!         | #VALUE! |
| 26S protease regulatory subunit 7 OS=Mus musculus GN=Psmc2    | P46471 (+1) | 49 kDa  | 6.00%         | 2                      | 1       | 2.0     | 1.9     | 0.9     | 0.9             | 0.90    |
| 26S protease regulatory subunit 8 OS=Mus musculus GN=Psmc5    | Q8K1K2      | 39 kDa  | 9.20%         | 2                      | 1       | 2.3     | 2.3     | 2.8     | 1.6             | 0.32    |
| 26S proteasome non-ATPase regulatory subunit 11 OS=Mus mu     | Q8BG32      | 47 kDa  | 8.30%         | 3                      | 1       | 0.9     | 1.0     | 0.9     | 1.0             | 0.71    |
| 26S proteasome non-ATPase regulatory subunit 13 OS=Mus mu     | E9Q5I9 (+1) | 40 kDa  | 6.00%         | 2                      | 1       | 0.9     | 1.0     | 1.5     | 1.3             | 0.35    |
| 26S proteasome non-ATPase regulatory subunit 2 OS=Mus musc    | Q8VDM4      | 100 kDa | 3.40%         | 3                      | 1       | 1.1     | 1.3     | 1.1     | 1.1             | 0.49    |
| 26S proteasome non-ATPase regulatory subunit 6 OS=Mus musc    | Q99JI4      | 46 kDa  | 6.20%         | 2                      | 1       | 0.8     | 1.1     | 1.0     | 1.2             | 0.34    |
| 28S ribosomal protein S36, mitochondrial OS=Mus musculus GN   | Q9CQX8 (+1) | 11 kDa  | 46.00%        | 3                      | 1       | 1.1     | 1.0     | 1.1     | 1.0             | 1.00    |
| 2-methoxy-6-polyprenyl-1,4-benzoquinol methylase, mitochon    | Q9CXI0      | 37 kDa  | 6.10%         | 2                      | 1       | 1.1     | 1.1     | 1.1     | 1.1             | 0.42    |
| 2-oxoglutarate dehydrogenase, mitochondrial OS=Mus musculu    | Q60597      | 116 kDa | 43.00%        | 38                     | 1       | 1.1     | 1.1     | 1.3     | 1.1             | 0.29    |
| 2-oxoisovalerate dehydrogenase subunit alpha, mitochondrial C | P50136 (+1) | 50 kDa  | 9.30%         | 3                      | 1       | 1.0     | 1.3     | 1.3     | 1.3             | 0.00    |
| 2-oxoisovalerate dehydrogenase subunit beta, mitochondrial OS | Q6P3A8      | 43 kDa  | 14.00%        | 4                      | 1       | 1.1     | 1.0     | 1.1     | 1.0             | 0.69    |
| 39S ribosomal protein L28, mitochondrial OS=Mus musculus GN   | Q9D1B9      | 30 kDa  | 8.20%         | 2                      | 1       | 1.3     | 1.6     | 1.5     | 1.4             | 0.14    |
| 3-hydroxyacyl-CoA dehydrogenase type-2 OS=Mus musculus GN     | A2AFQ2 (+2) | 28 kDa  | 20.00%        | 4                      | 1       | 0.7     | 0.8     | 0.9     | 1.0             | 0.94    |
| 3-hydroxyisobutyrate dehydrogenase, mitochondrial OS=Mus m    | Q99L13      | 35 kDa  | 18.00%        | 5                      | 1       | 1.6     | 1.5     | 1.7     | 1.2             | 0.44    |
| 3-hydroxyisobutyryl-CoA hydrolase, mitochondrial OS=Mus mus   | Q8QZS1      | 43 kDa  | 14.00%        | 5                      | 1       | 1.1     | 1.1     | 1.2     | 1.1             | 0.32    |
| 3-ketoacyl-CoA thiolase, mitochondrial OS=Mus musculus GN=A   | Q8BWT1      | 42 kDa  | 56.00%        | 14                     | 1       | 1.2     | 1.1     | 1.3     | 1.1             | 0.68    |
| 40S ribosomal protein S10 OS=Mus musculus GN=Rps10 PE=1 S     | P63325      | 19 kDa  | 28.00%        | 4                      | 1       | 0.9     | 1.1     | 1.1     | 1.2             | 0.03    |

|                                                                                       |             |        |        |    |   |     |     |     |     |      |
|---------------------------------------------------------------------------------------|-------------|--------|--------|----|---|-----|-----|-----|-----|------|
| 40S ribosomal protein S12 OS=Mus musculus GN=Rps12 PE=1 SV=1                          | P63323 (+1) | 15 kDa | 13.00% | 2  | 1 | 0.8 | 1.1 | 1.2 | 1.3 | 0.11 |
| 40S ribosomal protein S16 OS=Mus musculus GN=Rps16 PE=2 SV=1                          | P14131      | 16 kDa | 17.00% | 3  | 1 | 0.9 | 1.0 | 1.0 | 1.1 | 0.42 |
| 40S ribosomal protein S19 (Fragment) OS=Mus musculus GN=Rps19 PE=1 SV=1               | D3YUG3 (+5) | 15 kDa | 16.00% | 2  | 1 | 0.8 | 0.9 | 1.1 | 1.2 | 0.42 |
| 40S ribosomal protein S3 OS=Mus musculus GN=Rps3 PE=1 SV=1                            | D3YV43 (+1) | 21 kDa | 14.00% | 2  | 1 | 1.1 | 0.9 | 1.3 | 1.1 | 0.69 |
| 40S ribosomal protein S3a OS=Mus musculus GN=Rps3a2 PE=3 SV=1                         | D3Z6C3 (+2) | 30 kDa | 11.00% | 3  | 1 | 1.0 | 1.1 | 1.2 | 1.2 | 0.20 |
| 40S ribosomal protein S6 OS=Mus musculus GN=Rps6 PE=1 SV=1                            | P62754      | 29 kDa | 8.80%  | 2  | 1 | 0.7 | 1.0 | 1.1 | 1.2 | 0.35 |
| 40S ribosomal protein S8 OS=Mus musculus GN=Rps8 PE=1 SV=1                            | P62242      | 24 kDa | 9.60%  | 2  | 1 | 0.8 | 0.9 | 1.1 | 1.1 | 0.50 |
| 40S ribosomal protein S9 OS=Mus musculus GN=Rps9 PE=1 SV=1                            | Q6ZWN5      | 23 kDa | 9.80%  | 2  | 1 | 1.1 | 1.1 | 1.1 | 1.1 | 0.29 |
| 40S ribosomal protein SA OS=Mus musculus GN=Rpsa PE=1 SV=1                            | P14206      | 33 kDa | 9.50%  | 2  | 1 | 1.0 | 0.9 | 0.9 | 0.9 | 0.00 |
| 60 kDa heat shock protein, mitochondrial OS=Mus musculus GN=Hsp60 PE=1 SV=1           | P63038      | 61 kDa | 35.00% | 16 | 1 | 0.9 | 0.9 | 1.1 | 1.0 | 0.69 |
| 60S acidic ribosomal protein P0 (Fragment) OS=Mus musculus GN=Rplp0 PE=1 SV=1         | D3YVM5 (+2) | 16 kDa | 14.00% | 2  | 1 | 1.0 | 0.9 | 1.1 | 1.0 | 0.98 |
| 60S ribosomal protein L13a OS=Mus musculus GN=Rpl13a PE=1 SV=1                        | P19253 (+1) | 23 kDa | 8.40%  | 2  | 1 | 0.7 | 0.9 | 1.0 | 1.1 | 0.53 |
| 60S ribosomal protein L18a OS=Mus musculus GN=Rpl18a PE=1 SV=1                        | P62717      | 21 kDa | 12.00% | 2  | 1 | 0.9 | 1.5 | 1.2 | 1.4 | 0.11 |
| 60S ribosomal protein L24 OS=Mus musculus GN=Rpl24 PE=1 SV=1                          | Q8BP67      | 18 kDa | 11.00% | 2  | 1 | 0.9 | 1.1 | 1.0 | 1.1 | 0.31 |
| 60S ribosomal protein L4 OS=Mus musculus GN=Rpl4 PE=1 SV=3                            | Q9D8E6      | 47 kDa | 5.50%  | 2  | 1 | 1.0 | 0.9 | 1.1 | 1.0 | 0.95 |
| 60S ribosomal protein L5 OS=Mus musculus GN=Rpl5 PE=1 SV=3                            | P47962      | 34 kDa | 5.10%  | 2  | 1 | 0.8 | 1.3 | 1.2 | 1.4 | 0.07 |
| 60S ribosomal protein L6 OS=Mus musculus GN=Gm5428 PE=3 SV=1                          | E9PUX4 (+1) | 34 kDa | 13.00% | 4  | 1 | 1.0 | 1.0 | 1.1 | 1.1 | 0.42 |
| 60S ribosomal protein L7 OS=Mus musculus GN=Rpl7 PE=1 SV=2                            | P14148      | 31 kDa | 10.00% | 3  | 1 | 1.1 | 1.2 | 1.2 | 1.1 | 0.17 |
| 6-phosphofructokinase OS=Mus musculus GN=Pfkb PE=1 SV=1                               | Q8C605 (+1) | 86 kDa | 5.20%  | 2  | 1 | 0.7 | 0.8 | 1.0 | 1.1 | 0.84 |
| 78 kDa glucose-regulated protein OS=Mus musculus GN=Hspa5 PE=1 SV=1                   | P20029      | 72 kDa | 31.00% | 13 | 1 | 0.9 | 0.9 | 1.1 | 1.1 | 0.55 |
| Acetyl-CoA acetyltransferase, mitochondrial OS=Mus musculus GN=Acac1 PE=1 SV=1        | Q8QZT1      | 45 kDa | 41.00% | 13 | 1 | 1.1 | 1.0 | 1.1 | 1.0 | 0.69 |
| Acetyl-coenzyme A synthetase 2-like, mitochondrial OS=Mus musculus GN=Acas2 PE=1 SV=1 | Q99NB1      | 75 kDa | 15.00% | 8  | 1 | 1.0 | 1.1 | 1.2 | 1.2 | 0.20 |
| Aconitate hydratase, mitochondrial OS=Mus musculus GN=Aco2 PE=1 SV=1                  | Q99KI0      | 85 kDa | 51.00% | 34 | 1 | 1.1 | 1.1 | 1.2 | 1.1 | 0.32 |
| Actin, alpha cardiac muscle 1 OS=Mus musculus GN=Actc1 PE=1 SV=1                      | P68033      | 42 kDa | 47.00% | 17 | 1 | 1.2 | 0.9 | 1.1 | 0.9 | 0.49 |
| Actin, cytoplasmic 1 OS=Mus musculus GN=Actb PE=1 SV=1                                | P60710 (+1) | 42 kDa | 41.00% | 4  | 1 | 1.2 | 1.1 | 1.0 | 0.9 | 0.58 |
| Actin-related protein 2/3 complex subunit 2 OS=Mus musculus GN=Arp2 PE=1 SV=1         | Q9CVB6      | 34 kDa | 8.30%  | 3  | 1 | 0.9 | 1.1 | 1.1 | 1.2 | 0.03 |
| Actin-related protein 2/3 complex subunit 4 OS=Mus musculus GN=Arp4 PE=1 SV=1         | P59999      | 20 kDa | 15.00% | 3  | 1 | 0.9 | 1.0 | 0.9 | 1.0 | 1.00 |
| Actin-related protein 3 OS=Mus musculus GN=Actr3 PE=1 SV=3                            | Q99JY9      | 47 kDa | 5.70%  | 2  | 1 | 0.9 | 0.8 | 0.9 | 0.8 | 0.15 |

|                                                               |             |         |        |    |   |     |     |     |     |      |
|---------------------------------------------------------------|-------------|---------|--------|----|---|-----|-----|-----|-----|------|
| Acyl carrier protein (Fragment) OS=Mus musculus GN=Ndufab1    | F6ZFT1 (+2) | 14 kDa  | 17.00% | 3  | 1 | 0.9 | 1.1 | 1.1 | 1.1 | 0.09 |
| Acyl-CoA-binding protein OS=Mus musculus GN=Dbi PE=1 SV=2     | P31786      | 10 kDa  | 47.00% | 3  | 1 | 0.9 | 0.9 | 1.1 | 1.1 | 0.55 |
| Acyl-coenzyme A thioesterase 13 OS=Mus musculus GN=Acot13     | Q9CQR4      | 15 kDa  | 16.00% | 2  | 1 | 1.1 | 1.1 | 1.1 | 1.1 | 0.29 |
| Acyl-coenzyme A thioesterase 2, mitochondrial OS=Mus musculus | Q9QYR9      | 50 kDa  | 23.00% | 9  | 1 | 0.9 | 0.9 | 1.1 | 1.1 | 0.58 |
| Acylphosphatase-2 OS=Mus musculus GN=Acyp2 PE=2 SV=2          | P56375      | 12 kDa  | 34.00% | 4  | 1 | 1.1 | 1.1 | 1.2 | 1.1 | 0.11 |
| Acylpyruvate FAHD1, mitochondrial OS=Mus musculus GN=Fahc     | Q8R0F8      | 25 kDa  | 9.30%  | 2  | 1 | 1.1 | 1.4 | 1.3 | 1.3 | 0.03 |
| Adenosine kinase OS=Mus musculus GN=Adk PE=1 SV=2             | P55264 (+1) | 40 kDa  | 5.30%  | 2  | 1 | 1.1 | 1.3 | 1.2 | 1.2 | 0.15 |
| Adenylate kinase isoenzyme 1 OS=Mus musculus GN=Ak1 PE=1      | Q9R0Y5 (+1) | 22 kDa  | 49.00% | 10 | 1 | 1.0 | 1.0 | 1.1 | 1.1 | 0.42 |
| Adenylosuccinate synthetase isozyme 1 OS=Mus musculus GN=     | J3QN31 (+2) | 53 kDa  | 11.00% | 4  | 1 | 1.1 | 1.1 | 1.2 | 1.1 | 0.55 |
| Adiponectin OS=Mus musculus GN=Adipoq PE=1 SV=2               | Q60994      | 27 kDa  | 11.00% | 2  | 1 | 1.2 | 1.0 | 1.1 | 1.0 | 0.79 |
| ADP/ATP translocase 1 OS=Mus musculus GN=Slc25a4 PE=1 SV=     | P48962      | 33 kDa  | 52.00% | 18 | 1 | 1.1 | 1.0 | 1.1 | 1.0 | 0.69 |
| ADP/ATP translocase 2 OS=Mus musculus GN=Slc25a5 PE=1 SV=     | P51881      | 33 kDa  | 43.00% | 6  | 1 | 1.0 | 0.9 | 1.1 | 1.0 | 0.98 |
| ADP-ribosylation factor 3 OS=Mus musculus GN=Arf3 PE=2 SV=2   | P61205 (+1) | 21 kDa  | 13.00% | 2  | 1 | 0.9 | 0.9 | 1.1 | 1.1 | 0.58 |
| AFG3-like protein 2 OS=Mus musculus GN=Afg3l2 PE=1 SV=1       | Q8JZQ2      | 90 kDa  | 7.90%  | 6  | 1 | 1.0 | 0.9 | 1.1 | 1.0 | 0.98 |
| Aflatoxin B1 aldehyde reductase member 2 OS=Mus musculus G    | Q8CG76      | 41 kDa  | 7.10%  | 2  | 1 | 1.1 | 0.9 | 1.2 | 1.0 | 0.97 |
| A-kinase anchor protein 12 OS=Mus musculus GN=Akap12 PE=1     | Q9WTQ5 (+1) | 181 kDa | 2.10%  | 2  | 1 | 0.8 | 0.9 | 1.1 | 1.1 | 0.50 |
| Aldehyde dehydrogenase, mitochondrial OS=Mus musculus GN=     | P47738      | 57 kDa  | 30.00% | 11 | 1 | 1.1 | 1.1 | 1.2 | 1.1 | 0.11 |
| Aldose reductase OS=Mus musculus GN=Akr1b1 PE=1 SV=3          | P45376      | 36 kDa  | 32.00% | 9  | 1 | 1.0 | 1.1 | 1.2 | 1.2 | 0.20 |
| Alpha-1-antitrypsin 1-3 OS=Mus musculus GN=Serpina1c PE=1 S   | Q00896      | 46 kDa  | 24.00% | 8  | 1 | 1.1 | 0.9 | 0.9 | 0.9 | 0.10 |
| Alpha-2-HS-glycoprotein OS=Mus musculus GN=Ahsg PE=1 SV=1     | P29699      | 37 kDa  | 7.00%  | 2  | 1 | 2.1 | 1.9 | 3.2 | 1.6 | 0.39 |
| Alpha-2-macroglobulin OS=Mus musculus GN=Pzp PE=4 SV=1        | D3YW52 (+1) | 167 kDa | 3.60%  | 4  | 1 | 1.1 | 1.0 | 1.0 | 1.0 | 0.42 |
| Alpha-actinin-2 OS=Mus musculus GN=Actn2 PE=1 SV=2            | Q9JI91      | 104 kDa | 47.00% | 34 | 1 | 1.1 | 0.9 | 1.0 | 0.9 | 0.32 |
| Alpha-crystallin B chain OS=Mus musculus GN=Cryab PE=1 SV=2   | P23927      | 20 kDa  | 55.00% | 8  | 1 | 0.9 | 1.0 | 1.1 | 1.1 | 0.29 |
| Alpha-enolase OS=Mus musculus GN=Eno1 PE=1 SV=3               | P17182      | 47 kDa  | 24.00% | 5  | 1 | 1.0 | 1.0 | 1.2 | 1.1 | 0.42 |
| Aminoacyl tRNA synthase complex-interacting multifunctional p | P31230 (+1) | 34 kDa  | 12.00% | 2  | 1 | 0.9 | 0.9 | 1.0 | 1.0 | 1.00 |
| Annexin A2 OS=Mus musculus GN=Anxa2 PE=1 SV=2                 | P07356      | 39 kDa  | 25.00% | 8  | 1 | 0.9 | 0.9 | 1.0 | 1.0 | 0.71 |
| Annexin A5 OS=Mus musculus GN=Anxa5 PE=1 SV=1                 | P48036      | 36 kDa  | 35.00% | 9  | 1 | 0.9 | 1.1 | 1.1 | 1.1 | 0.11 |
| Annexin OS=Mus musculus GN=Anxa6 PE=1 SV=1                    | F8WIT2 (+1) | 75 kDa  | 10.00% | 6  | 1 | 1.0 | 1.0 | 1.1 | 1.0 | 0.42 |

|                                                               |             |         |        |    |   |     |     |     |     |      |
|---------------------------------------------------------------|-------------|---------|--------|----|---|-----|-----|-----|-----|------|
| AP-1 complex subunit beta-1 OS=Mus musculus GN=Ap1b1 PE=      | O35643 (+2) | 104 kDa | 2.20%  | 2  | 1 | 0.8 | 0.8 | 1.0 | 1.0 | 1.00 |
| Apolipoprotein A-I OS=Mus musculus GN=Apoa1 PE=1 SV=2         | Q00623      | 31 kDa  | 34.00% | 9  | 1 | 1.2 | 1.1 | 1.0 | 0.9 | 0.58 |
| Apolipoprotein A-IV OS=Mus musculus GN=Apoa4 PE=1 SV=3        | P06728      | 45 kDa  | 6.60%  | 3  | 1 | 1.1 | 1.2 | 0.9 | 1.0 | 0.97 |
| Apolipoprotein O OS=Mus musculus GN=ApoO PE=4 SV=1            | B1ASQ2 (+2) | 23 kDa  | 39.00% | 6  | 1 | 1.0 | 1.0 | 1.1 | 1.0 | 0.42 |
| Apolipoprotein O-like OS=Mus musculus GN=ApoO PE=2 SV=1       | Q78IK4      | 29 kDa  | 19.00% | 4  | 1 | 1.1 | 1.1 | 1.0 | 1.0 | 1.00 |
| Apoptosis-inducing factor 1, mitochondrial OS=Mus musculus G  | B1AU25 (+1) | 66 kDa  | 23.00% | 11 | 1 | 1.1 | 1.1 | 1.1 | 1.0 | 0.71 |
| Aspartate aminotransferase, cytoplasmic OS=Mus musculus GN=   | P05201      | 46 kDa  | 46.00% | 15 | 1 | 0.9 | 1.0 | 1.1 | 1.1 | 0.29 |
| Aspartate aminotransferase, mitochondrial OS=Mus musculus G   | P05202      | 47 kDa  | 37.00% | 18 | 1 | 1.1 | 1.1 | 1.3 | 1.2 | 0.17 |
| Aspartyl aminopeptidase OS=Mus musculus GN=Dnpep PE=2 SV      | Q9Z2W0      | 52 kDa  | 5.30%  | 2  | 1 | 1.1 | 0.9 | 1.1 | 0.9 | 0.61 |
| Aspartyl/asparaginyl beta-hydroxylase OS=Mus musculus GN=A    | A2AL85 (+2) | 81 kDa  | 4.40%  | 2  | 1 | 1.1 | 1.0 | 1.1 | 1.0 | 1.00 |
| ATP synthase F(0) complex subunit B1, mitochondrial OS=Mus n  | Q9CQQ7      | 29 kDa  | 31.00% | 12 | 1 | 1.1 | 1.0 | 1.1 | 1.0 | 0.69 |
| ATP synthase protein 8 OS=Mus musculus GN=Mtstp8 PE=1 SV=     | P03930 (+1) | 8 kDa   | 43.00% | 3  | 1 | 1.1 | 1.0 | 1.1 | 1.0 | 1.00 |
| ATP synthase subunit alpha, mitochondrial OS=Mus musculus G   | Q03265      | 60 kDa  | 48.00% | 24 | 1 | 1.0 | 1.0 | 1.1 | 1.0 | 0.42 |
| ATP synthase subunit beta, mitochondrial OS=Mus musculus GN   | P56480      | 56 kDa  | 50.00% | 19 | 1 | 1.0 | 0.9 | 1.1 | 1.0 | 0.98 |
| ATP synthase subunit delta, mitochondrial OS=Mus musculus Gf  | Q9D3D9      | 18 kDa  | 17.00% | 3  | 1 | 1.1 | 0.9 | 1.1 | 1.0 | 0.97 |
| ATP synthase subunit e, mitochondrial OS=Mus musculus GN=A    | Q06185      | 8 kDa   | 52.00% | 4  | 1 | 1.0 | 0.9 | 1.0 | 1.0 | 0.42 |
| ATP synthase subunit epsilon, mitochondrial OS=Mus musculus   | P56382      | 6 kDa   | 29.00% | 2  | 1 | 0.9 | 1.1 | 1.1 | 1.1 | 0.09 |
| ATP synthase subunit f, mitochondrial OS=Mus musculus GN=At   | P56135      | 10 kDa  | 26.00% | 2  | 1 | 1.1 | 0.9 | 1.1 | 1.0 | 0.82 |
| ATP synthase subunit g, mitochondrial OS=Mus musculus GN=A    | Q9CPQ8      | 11 kDa  | 34.00% | 4  | 1 | 0.9 | 1.0 | 1.0 | 1.1 | 0.42 |
| ATP synthase subunit gamma OS=Mus musculus GN=Atp5c1 PE=      | A2AKU9 (+2) | 33 kDa  | 21.00% | 6  | 1 | 0.9 | 0.9 | 1.1 | 1.0 | 0.69 |
| ATP synthase subunit O, mitochondrial OS=Mus musculus GN=A    | Q9DB20      | 23 kDa  | 42.00% | 8  | 1 | 1.1 | 1.1 | 1.1 | 1.1 | 0.29 |
| ATP synthase-coupling factor 6, mitochondrial OS=Mus muscu    | P97450      | 12 kDa  | 35.00% | 3  | 1 | 1.0 | 1.0 | 1.1 | 1.0 | 0.42 |
| ATPase family AAA domain-containing protein 3 OS=Mus muscu    | Q925I1 (+1) | 67 kDa  | 6.60%  | 3  | 1 | 1.2 | 0.9 | 1.1 | 0.9 | 0.68 |
| ATPase inhibitor, mitochondrial OS=Mus musculus GN=Atpif1 P   | E9PV44 (+1) | 9 kDa   | 24.00% | 2  | 1 | 1.2 | 1.1 | 1.3 | 1.1 | 0.68 |
| ATP-binding cassette sub-family B member 8, mitochondrial OS= | Q9CXJ4      | 78 kDa  | 3.50%  | 2  | 1 | 1.1 | 1.0 | 1.3 | 1.1 | 0.68 |
| ATP-dependent 6-phosphofructokinase, liver type OS=Mus mus    | P12382      | 85 kDa  | 5.90%  | 2  | 1 | 0.9 | 1.1 | 1.2 | 1.2 | 0.17 |
| ATP-dependent 6-phosphofructokinase, muscle type OS=Mus m     | P47857      | 85 kDa  | 21.00% | 13 | 1 | 1.1 | 1.1 | 1.2 | 1.1 | 0.11 |
| ATP-dependent Clp protease proteolytic subunit, mitochondrial | O88696      | 30 kDa  | 12.00% | 2  | 1 | 1.4 | 1.2 | 1.5 | 1.1 | 0.58 |

|                                                                                                     |             |         |        |    |   |     |         |         |         |         |
|-----------------------------------------------------------------------------------------------------|-------------|---------|--------|----|---|-----|---------|---------|---------|---------|
| BAG family molecular chaperone regulator 3 OS=Mus musculus                                          | Q9JLV1      | 62 kDa  | 8.80%  | 5  | 1 | 0.8 | 0.8     | 0.9     | 0.9     | 0.58    |
| Beta-enolase OS=Mus musculus GN=Eno3 PE=1 SV=3                                                      | P21550      | 47 kDa  | 49.00% | 17 | 1 | 1.2 | 1.2     | 1.2     | 1.1     | 0.42    |
| Bifunctional epoxide hydrolase 2 OS=Mus musculus GN=Ephx2 PE=1 SV=1                                 | P34914      | 63 kDa  | 16.00% | 7  | 1 | 1.1 | 1.1     | 1.3     | 1.1     | 0.49    |
| Bifunctional glutamate/proline--tRNA ligase OS=Mus musculus GN=Plgl1 PE=1 SV=1                      | Q8CGC7      | 170 kDa | 3.00%  | 4  | 1 | 0.9 | 1.1     | 1.2     | 1.2     | 0.17    |
| Branched-chain-amino-acid aminotransferase OS=Mus musculus GN=Bcat PE=1 SV=1                        | D3Z7C8 (+2) | 43 kDa  | 9.00%  | 3  | 1 | 1.0 | 1.1     | 1.2     | 1.2     | 0.20    |
| Cadherin-2 OS=Mus musculus GN=Cdh2 PE=3 SV=1                                                        | D3YYT0 (+1) | 94 kDa  | 8.40%  | 5  | 1 | 1.0 | 0.9     | 1.0     | 1.0     | 0.42    |
| Calcium-binding mitochondrial carrier protein Aralar1 OS=Mus musculus GN=Arar1 PE=1 SV=1            | Q8BH59      | 75 kDa  | 26.00% | 15 | 1 | 1.1 | 1.1     | 1.2     | 1.1     | 0.55    |
| Calcium-binding mitochondrial carrier protein Aralar2 OS=Mus musculus GN=Arar2 PE=1 SV=1            | Q9QXX4      | 74 kDa  | 18.00% | 6  | 1 | 1.0 | 0.9     | 1.0     | 1.0     | 0.42    |
| Calmodulin OS=Mus musculus GN=Calm1 PE=1 SV=2                                                       | P62204      | 17 kDa  | 20.00% | 4  | 1 | 0.9 | 1.0     | 1.0     | 1.0     | 0.42    |
| Calnexin OS=Mus musculus GN=Canx PE=1 SV=1                                                          | P35564      | 67 kDa  | 7.60%  | 4  | 1 | 1.0 | 1.1     | 1.2     | 1.2     | 0.20    |
| Calpastatin OS=Mus musculus GN=Cast PE=1 SV=2                                                       | P51125 (+5) | 85 kDa  | 3.60%  | 2  | 1 | 2.0 | 2.1     | 1.9     | 1.3     | 0.43    |
| Calreticulin OS=Mus musculus GN=Calr PE=1 SV=1                                                      | P14211      | 48 kDa  | 20.00% | 5  | 1 | 0.7 | 0.8     | 0.9     | 1.0     | 0.94    |
| Calsequestrin OS=Mus musculus GN=Casq2 PE=3 SV=1                                                    | F6QYE1 (+1) | 48 kDa  | 14.00% | 7  | 1 | 1.0 | 1.1     | 1.1     | 1.1     | 0.10    |
| Calumenin (Fragment) OS=Mus musculus GN=Calu PE=1 SV=1                                              | G3UXA8 (+3) | 20 kDa  | 19.00% | 2  | 1 | 0.9 | #VALUE! | #VALUE! | #VALUE! | #VALUE! |
| CAP-Gly domain-containing linker protein 1 OS=Mus musculus GN=Cplp1 PE=1 SV=1                       | D3Z2Z1 (+4) | 160 kDa | 2.90%  | 3  | 1 | 0.9 | 0.8     | 1.0     | 0.9     | 0.72    |
| Carboxylesterase 1C OS=Mus musculus GN=Ces1c PE=1 SV=4                                              | P23953      | 61 kDa  | 9.70%  | 5  | 1 | 1.9 | 1.9     | 1.3     | 1.1     | 0.78    |
| Carnitine O-acetyltransferase OS=Mus musculus GN=Crat PE=1 SV=1                                     | H7BX88 (+1) | 69 kDa  | 29.00% | 16 | 1 | 1.1 | 1.1     | 1.2     | 1.1     | 0.11    |
| Carnitine O-palmitoyltransferase 1, muscle isoform OS=Mus musculus GN=Cpt1b PE=1 SV=1               | Q924X2      | 88 kDa  | 19.00% | 16 | 1 | 1.0 | 1.0     | 1.1     | 1.0     | 0.42    |
| Carnitine O-palmitoyltransferase 2, mitochondrial OS=Mus musculus GN=Cpt1a PE=1 SV=1                | P52825      | 74 kDa  | 19.00% | 10 | 1 | 0.9 | 0.9     | 1.1     | 1.0     | 0.79    |
| Catalase OS=Mus musculus GN=Cat PE=1 SV=4                                                           | P24270      | 60 kDa  | 6.50%  | 3  | 1 | 0.9 | 0.8     | 1.1     | 1.0     | 0.83    |
| Catenin alpha-1 OS=Mus musculus GN=Ctnna1 PE=1 SV=1                                                 | P26231      | 100 kDa | 3.90%  | 3  | 1 | 0.8 | 0.8     | 1.0     | 1.0     | 0.88    |
| Cathepsin B OS=Mus musculus GN=Ctsb PE=1 SV=2                                                       | P10605      | 37 kDa  | 8.80%  | 2  | 1 | 1.1 | 1.1     | 1.1     | 1.1     | 0.09    |
| Cathepsin D (Fragment) OS=Mus musculus GN=Ctsd PE=3 SV=1                                            | F6Y6L6 (+1) | 30 kDa  | 23.00% | 5  | 1 | 1.6 | 1.9     | 2.1     | 1.5     | 0.18    |
| Caveolin-1 OS=Mus musculus GN=Cav1 PE=1 SV=1                                                        | P49817      | 21 kDa  | 21.00% | 4  | 1 | 0.9 | 0.9     | 1.0     | 1.0     | 1.00    |
| CDGSH iron-sulfur domain-containing protein 1 OS=Mus musculus GN=Cdgs1 PE=1 SV=1                    | Q91WS0      | 12 kDa  | 34.00% | 3  | 1 | 0.9 | 0.9     | 0.9     | 1.0     | 0.42    |
| Cell division control protein 42 homolog OS=Mus musculus GN=Cdc42 PE=1 SV=1                         | P60766      | 21 kDa  | 15.00% | 2  | 1 | 1.1 | 1.1     | 1.1     | 1.0     | 0.42    |
| Ceruloplasmin OS=Mus musculus GN=Cp PE=4 SV=1                                                       | E9PZD8 (+3) | 124 kDa | 4.40%  | 4  | 1 | 0.9 | 0.7     | 1.2     | 1.0     | 0.91    |
| Chaperone activity of bc1 complex-like, mitochondrial (Fragment) OS=Mus musculus GN=Cc1l1 PE=1 SV=1 | F7B1B6 (+2) | 45 kDa  | 6.20%  | 2  | 1 | 1.1 | 0.8     | 1.0     | 0.9     | 0.33    |

|                                                                    |             |         |        |    |   |     |     |     |     |      |
|--------------------------------------------------------------------|-------------|---------|--------|----|---|-----|-----|-----|-----|------|
| Chloride intracellular channel protein 4 OS=Mus musculus GN=C      | Q9QYB1      | 29 kDa  | 14.00% | 2  | 1 | 1.9 | 1.7 | 2.0 | 1.3 | 0.44 |
| Citrate lyase subunit beta-like protein, mitochondrial OS=Mus m    | Q8R4N0      | 38 kDa  | 11.00% | 3  | 1 | 1.0 | 1.0 | 1.4 | 1.2 | 0.42 |
| Citrate synthase, mitochondrial OS=Mus musculus GN=Cs PE=1         | Q9CZU6      | 52 kDa  | 20.00% | 9  | 1 | 1.1 | 1.2 | 1.3 | 1.2 | 0.15 |
| Clathrin heavy chain OS=Mus musculus GN=Cltc PE=1 SV=1             | Q5SXR6 (+1) | 192 kDa | 15.00% | 19 | 1 | 0.9 | 1.0 | 1.1 | 1.1 | 0.31 |
| Clustered mitochondria protein homolog OS=Mus musculus GN          | Q5SW19 (+2) | 148 kDa | 2.30%  | 2  | 1 | 1.1 | 0.9 | 0.7 | 0.8 | 0.23 |
| Cofilin-1 OS=Mus musculus GN=Cfl1 PE=1 SV=1                        | F8WGL3 (+1) | 25 kDa  | 22.00% | 3  | 1 | 0.9 | 1.1 | 0.9 | 1.1 | 0.55 |
| Cofilin-2 OS=Mus musculus GN=Cfl2 PE=1 SV=1                        | P45591      | 19 kDa  | 38.00% | 5  | 1 | 0.8 | 0.9 | 1.1 | 1.1 | 0.50 |
| Coiled-coil-helix-coiled-coil-helix domain-containing protein 3, n | Q9CRB9      | 26 kDa  | 27.00% | 5  | 1 | 1.1 | 1.0 | 1.1 | 1.0 | 0.69 |
| Complement C3 OS=Mus musculus GN=C3 PE=1 SV=3                      | P01027      | 186 kDa | 7.90%  | 10 | 1 | 0.7 | 0.7 | 1.1 | 1.1 | 0.76 |
| Complement component 1 Q subcomponent-binding protein, m           | Q8R5L1      | 31 kDa  | 16.00% | 3  | 1 | 1.1 | 1.1 | 1.1 | 1.0 | 0.98 |
| Creatine kinase B-type OS=Mus musculus GN=Ckb PE=1 SV=1            | Q04447      | 43 kDa  | 19.00% | 4  | 1 | 0.8 | 1.0 | 0.9 | 1.0 | 0.82 |
| Creatine kinase M-type OS=Mus musculus GN=Ckm PE=1 SV=1            | P07310      | 43 kDa  | 48.00% | 15 | 1 | 1.0 | 1.1 | 1.1 | 1.1 | 0.10 |
| Creatine kinase S-type, mitochondrial OS=Mus musculus GN=CK        | Q6P8J7      | 47 kDa  | 54.00% | 19 | 1 | 1.1 | 1.0 | 1.1 | 1.0 | 0.69 |
| Cysteine and glycine-rich protein 3 OS=Mus musculus GN=Csrp3       | P50462      | 21 kDa  | 41.00% | 8  | 1 | 0.9 | 1.0 | 1.1 | 1.1 | 0.29 |
| Cysteine-rich protein 2 OS=Mus musculus GN=Crip2 PE=1 SV=1         | Q9DCT8      | 23 kDa  | 32.00% | 4  | 1 | 0.9 | 1.0 | 1.1 | 1.1 | 0.32 |
| Cytochrome b OS=Mus musculus GN=Mt-Cyb PE=2 SV=1                   | P00158 (+1) | 43 kDa  | 3.90%  | 2  | 1 | 1.2 | 1.1 | 1.1 | 1.0 | 0.80 |
| Cytochrome b-c1 complex subunit 1, mitochondrial OS=Mus mu         | Q9CZ13      | 53 kDa  | 33.00% | 12 | 1 | 1.1 | 1.0 | 1.1 | 1.0 | 0.69 |
| Cytochrome b-c1 complex subunit 2, mitochondrial OS=Mus mu         | Q9DB77      | 48 kDa  | 43.00% | 15 | 1 | 1.1 | 1.0 | 1.1 | 1.0 | 1.00 |
| Cytochrome b-c1 complex subunit 6, mitochondrial OS=Mus mu         | P99028      | 10 kDa  | 62.00% | 5  | 1 | 1.1 | 1.2 | 1.3 | 1.2 | 0.05 |
| Cytochrome b-c1 complex subunit 7 OS=Mus musculus GN=Uqc           | Q9CQB4 (+1) | 14 kDa  | 44.00% | 6  | 1 | 1.1 | 1.0 | 1.1 | 1.0 | 0.69 |
| Cytochrome b-c1 complex subunit 8 OS=Mus musculus GN=Uqc           | Q9CQ69      | 10 kDa  | 39.00% | 5  | 1 | 1.1 | 1.0 | 1.1 | 1.0 | 1.00 |
| Cytochrome b-c1 complex subunit 9 OS=Mus musculus GN=Uqc           | Q8R111      | 7 kDa   | 38.00% | 2  | 1 | 0.9 | 1.0 | 1.0 | 1.1 | 0.42 |
| Cytochrome b-c1 complex subunit Rieske, mitochondrial OS=M         | Q9CR68      | 29 kDa  | 25.00% | 5  | 1 | 1.1 | 1.1 | 1.1 | 1.1 | 0.29 |
| Cytochrome c oxidase assembly factor 3 homolog, mitochondria       | E9Q6W2 (+1) | 10 kDa  | 23.00% | 2  | 1 | 1.0 | 1.1 | 1.0 | 1.0 | 0.42 |
| Cytochrome c oxidase subunit 2 OS=Mus musculus GN=Mtco2 P          | P00405 (+1) | 26 kDa  | 25.00% | 4  | 1 | 1.0 | 0.9 | 1.0 | 1.0 | 0.42 |
| Cytochrome c oxidase subunit 4 isoform 1, mitochondrial OS=M       | P19783      | 20 kDa  | 51.00% | 8  | 1 | 1.1 | 1.0 | 1.1 | 1.0 | 1.00 |
| Cytochrome c oxidase subunit 5A, mitochondrial OS=Mus muscu        | P12787      | 16 kDa  | 21.00% | 3  | 1 | 1.0 | 0.9 | 1.1 | 1.0 | 0.80 |
| Cytochrome c oxidase subunit 5B, mitochondrial OS=Mus muscu        | P19536 (+1) | 14 kDa  | 53.00% | 6  | 1 | 1.1 | 1.1 | 1.1 | 1.1 | 0.29 |

|                                                                                             |               |         |        |    |   |         |         |         |         |         |
|---------------------------------------------------------------------------------------------|---------------|---------|--------|----|---|---------|---------|---------|---------|---------|
| Cytochrome c oxidase subunit 6B1 OS=Mus musculus GN=Cox6b1                                  | P56391        | 10 kDa  | 62.00% | 5  | 1 | 1.0     | 1.0     | 1.1     | 1.0     | 0.42    |
| Cytochrome c oxidase subunit 6C OS=Mus musculus GN=Cox6c                                    | Q9CPQ1        | 8 kDa   | 38.00% | 5  | 1 | 1.1     | 0.9     | 1.1     | 1.0     | 0.71    |
| Cytochrome c oxidase subunit 7A1, mitochondrial OS=Mus musculus                             | P56392        | 9 kDa   | 29.00% | 2  | 1 | 1.2     | 0.9     | 1.0     | 0.9     | 0.34    |
| Cytochrome c oxidase subunit 7A2, mitochondrial OS=Mus musculus                             | P48771        | 9 kDa   | 28.00% | 2  | 1 | 1.1     | 1.1     | 1.1     | 1.1     | 0.29    |
| Cytochrome c oxidase subunit 7C, mitochondrial OS=Mus musculus                              | P17665        | 7 kDa   | 29.00% | 2  | 1 | 1.1     | 1.0     | 1.1     | 1.0     | 0.69    |
| Cytochrome c1, heme protein, mitochondrial OS=Mus musculus                                  | Q9D0M3 (+1)   | 35 kDa  | 23.00% | 5  | 1 | 0.9     | 1.1     | 1.1     | 1.2     | 0.15    |
| Cytochrome c-type heme lyase OS=Mus musculus GN=Hccs PE=1 SV=1                              | P53702        | 31 kDa  | 6.60%  | 2  | 1 | 0.9     | 1.2     | 1.0     | 1.2     | 0.34    |
| Cytoplasmic dynein 1 heavy chain 1 OS=Mus musculus GN=Dync1h1                               | Q9JHU4        | 532 kDa | 2.10%  | 8  | 1 | 0.9     | 1.0     | 0.9     | 1.0     | 0.71    |
| Cytoplasmic dynein 1 intermediate chain 2 OS=Mus musculus GN=Dync1i2                        | A2BFF5 (+4)   | 71 kDa  | 6.40%  | 3  | 1 | 0.8     | 0.7     | 0.8     | 0.8     | 0.36    |
| Cytosolic 5'-nucleotidase 3A OS=Mus musculus GN=Nt5c3a PE=1 SV=1                            | Q9D020 (+1)   | 37 kDa  | 7.30%  | 2  | 1 | 1.1     | 1.2     | 1.3     | 1.2     | 0.05    |
| D3YXL0-R                                                                                    | D3YXL0-R (+1) | ?       | 0.00%  | 2  | 1 | 1.1     | 0.9     | 1.2     | 1.0     | 0.79    |
| D-beta-hydroxybutyrate dehydrogenase, mitochondrial OS=Mus musculus                         | Q80XN0        | 38 kDa  | 19.00% | 6  | 1 | 1.1     | 1.1     | 1.0     | 1.0     | 1.00    |
| Dehydrogenase/reductase SDR family member 4 OS=Mus musculus                                 | Q99LB2        | 30 kDa  | 14.00% | 4  | 1 | 0.8     | 0.9     | 1.1     | 1.1     | 0.45    |
| Delta(3,5)-Delta(2,4)-dienoyl-CoA isomerase, mitochondrial OS=Mus musculus                  | O35459        | 36 kDa  | 31.00% | 9  | 1 | 0.8     | 0.9     | 1.1     | 1.1     | 0.68    |
| Delta-aminolevulinic acid dehydratase OS=Mus musculus GN=Ala PE=1 SV=1                      | P10518        | 36 kDa  | 8.80%  | 2  | 1 | 1.1     | 1.0     | 1.1     | 1.0     | 1.00    |
| Desmin OS=Mus musculus GN=Des PE=1 SV=3                                                     | P31001        | 53 kDa  | 54.00% | 23 | 1 | 0.7     | 0.8     | 0.9     | 1.0     | 0.92    |
| Desmoplakin OS=Mus musculus GN=Dsp PE=1 SV=1                                                | E9PZW0 (+1)   | 261 kDa | 0.70%  | 2  | 1 | 1.1     | 1.1     | 0.9     | 0.9     | 0.55    |
| Dextrin OS=Mus musculus GN=Dstn PE=1 SV=3                                                   | Q9R0P5        | 19 kDa  | 15.00% | 2  | 1 | 0.9     | 1.0     | 1.1     | 1.1     | 0.29    |
| Diablo homolog, mitochondrial OS=Mus musculus GN=Diablo PE=1 SV=1                           | Q9JIQ3        | 27 kDa  | 8.40%  | 2  | 1 | #VALUE! | #VALUE! | #VALUE! | #VALUE! | #VALUE! |
| Dihydrolipoyl dehydrogenase, mitochondrial OS=Mus musculus                                  | O08749        | 54 kDa  | 23.00% | 11 | 1 | 1.1     | 1.1     | 1.1     | 1.1     | 0.29    |
| Dihydrolipoyllysine-residue acetyltransferase component of pyruvate dehydrogenase complex   | Q8BMF4        | 68 kDa  | 25.00% | 13 | 1 | 1.0     | 1.1     | 1.1     | 1.1     | 0.10    |
| Dihydrolipoyllysine-residue succinyltransferase component of pyruvate dehydrogenase complex | Q9D2G2        | 49 kDa  | 25.00% | 10 | 1 | 1.2     | 1.2     | 1.4     | 1.2     | 0.30    |
| Dihydropyrimidinase-related protein 2 OS=Mus musculus GN=Dhprp2                             | O08553        | 62 kDa  | 5.40%  | 2  | 1 | 1.0     | 1.0     | 1.1     | 1.1     | 0.42    |
| DnaJ homolog subfamily A member 2 OS=Mus musculus GN=DnaJ2                                  | Q9QYJ0        | 46 kDa  | 8.50%  | 3  | 1 | 0.9     | 1.1     | 1.1     | 1.1     | 0.11    |
| DnaJ homolog subfamily A member 3, mitochondrial OS=Mus musculus                            | Q99M87 (+2)   | 52 kDa  | 9.60%  | 3  | 1 | 0.9     | 0.9     | 1.1     | 1.0     | 0.69    |
| DnaJ homolog subfamily A member 4 OS=Mus musculus GN=DnaJ4                                  | Q9JMC3        | 45 kDa  | 8.80%  | 3  | 1 | 0.9     | 1.1     | 1.1     | 1.2     | 0.08    |
| Dolichyl-diphosphooligosaccharide--protein glycosyltransferase                              | Q91YQ5        | 69 kDa  | 4.10%  | 2  | 1 | 0.9     | 0.9     | 1.0     | 1.0     | 0.71    |
| Dysferlin OS=Mus musculus GN=Dysf PE=4 SV=1                                                 | E9PXU9 (+5)   | 237 kDa | 1.60%  | 3  | 1 | 1.1     | 1.1     | 1.1     | 1.1     | 0.42    |

|                                                                                                           |             |         |        |    |   |     |     |     |     |      |
|-----------------------------------------------------------------------------------------------------------|-------------|---------|--------|----|---|-----|-----|-----|-----|------|
| Dystrophin OS=Mus musculus GN=Dmd PE=1 SV=3                                                               | P11531      | 426 kDa | 0.87%  | 3  | 1 | 1.7 | 1.3 | 1.5 | 1.0 | 0.91 |
| Echinoderm microtubule-associated protein-like 2 OS=Mus musculus GN=Eef1a2 PE=1 SV=2                      | D3YWS2 (+3) | 67 kDa  | 3.60%  | 2  | 1 | 2.5 | 2.5 | 3.2 | 1.6 | 0.31 |
| EH domain-containing protein 1 OS=Mus musculus GN=Ehd1 PE=1 SV=2                                          | Q9WVK4      | 61 kDa  | 6.40%  | 3  | 1 | 0.7 | 0.8 | 0.8 | 1.0 | 0.80 |
| EH domain-containing protein 2 OS=Mus musculus GN=Ehd2 PE=1 SV=2                                          | Q8BH64      | 61 kDa  | 9.20%  | 3  | 1 | 1.2 | 1.1 | 1.3 | 1.1 | 0.68 |
| EH domain-containing protein 4 OS=Mus musculus GN=Ehd4 PE=1 SV=2                                          | Q9EQP2      | 61 kDa  | 17.00% | 8  | 1 | 0.8 | 0.9 | 1.0 | 1.1 | 0.56 |
| Electron transfer flavoprotein subunit alpha, mitochondrial OS=Mus musculus GN=Etfam1 PE=1 SV=2           | Q99LC5      | 35 kDa  | 49.00% | 12 | 1 | 1.1 | 1.1 | 1.2 | 1.1 | 0.31 |
| Electron transfer flavoprotein subunit beta OS=Mus musculus GN=Etfam2 PE=1 SV=2                           | Q9DCW4      | 28 kDa  | 46.00% | 11 | 1 | 1.1 | 1.1 | 1.2 | 1.1 | 0.32 |
| Electron transfer flavoprotein-ubiquinone oxidoreductase, mitochondrial OS=Mus musculus GN=Etf1 PE=1 SV=2 | Q921G7      | 68 kDa  | 37.00% | 20 | 1 | 1.0 | 0.9 | 1.1 | 1.0 | 0.98 |
| Elongation factor 1-alpha 2 OS=Mus musculus GN=Eef1a2 PE=1 SV=2                                           | P62631      | 50 kDa  | 16.00% | 8  | 1 | 0.9 | 1.1 | 1.1 | 1.1 | 0.11 |
| Elongation factor 1-delta (Fragment) OS=Mus musculus GN=Eef1d1 PE=1 SV=2                                  | D3YUQ9 (+9) | 21 kDa  | 17.00% | 3  | 1 | 1.0 | 1.0 | 1.1 | 1.0 | 0.42 |
| Elongation factor 1-gamma OS=Mus musculus GN=Eef1g PE=1 SV=2                                              | Q9D8N0      | 50 kDa  | 18.00% | 6  | 1 | 0.9 | 1.0 | 1.2 | 1.2 | 0.34 |
| Elongation factor 2 OS=Mus musculus GN=Eef2 PE=1 SV=2                                                     | P58252      | 95 kDa  | 15.00% | 13 | 1 | 0.9 | 1.1 | 1.2 | 1.2 | 0.05 |
| Elongation factor G, mitochondrial OS=Mus musculus GN=Gfm1 PE=1 SV=2                                      | Q8K0D5      | 84 kDa  | 2.90%  | 2  | 1 | 0.9 | 0.8 | 1.1 | 1.0 | 0.87 |
| Elongation factor Tu OS=Mus musculus GN=Gm9755 PE=3 SV=1                                                  | D3YVN7 (+1) | 50 kDa  | 28.00% | 10 | 1 | 1.1 | 1.1 | 1.1 | 1.0 | 0.98 |
| Endonuclease G, mitochondrial OS=Mus musculus GN=Endog1 PE=1 SV=2                                         | O08600      | 32 kDa  | 9.20%  | 2  | 1 | 0.8 | 0.9 | 1.2 | 1.2 | 0.40 |
| Endoplasmic reticulum chaperone protein OS=Mus musculus GN=Hsp90b1 PE=1 SV=2                              | P08113      | 92 kDa  | 6.10%  | 4  | 1 | 0.8 | 0.9 | 1.1 | 1.1 | 0.50 |
| Enoyl-CoA delta isomerase 1, mitochondrial OS=Mus musculus GN=Ech1 PE=1 SV=2                              | P42125      | 32 kDa  | 36.00% | 10 | 1 | 1.0 | 1.0 | 1.1 | 1.1 | 0.42 |
| Enoyl-CoA delta isomerase 2, mitochondrial OS=Mus musculus GN=Ech2 PE=1 SV=2                              | Q3TCD4 (+2) | 42 kDa  | 9.30%  | 3  | 1 | 1.0 | 1.0 | 1.0 | 1.0 | 0.00 |
| Enoyl-CoA hydratase, mitochondrial OS=Mus musculus GN=Ech3 PE=1 SV=2                                      | Q8BH95      | 31 kDa  | 27.00% | 7  | 1 | 1.1 | 1.1 | 1.1 | 1.1 | 0.29 |
| Epimerase family protein SDR39U1 OS=Mus musculus GN=Sdr39u1 PE=1 SV=2                                     | Q5M8N4 (+1) | 33 kDa  | 8.80%  | 2  | 1 | 1.1 | 1.2 | 1.1 | 1.1 | 0.32 |
| ES1 protein homolog, mitochondrial OS=Mus musculus GN=D10E01 PE=1 SV=2                                    | Q9D172      | 28 kDa  | 46.00% | 9  | 1 | 1.1 | 1.1 | 1.1 | 1.1 | 0.29 |
| Eukaryotic initiation factor 4A-II OS=Mus musculus GN=Eif4a2 PE=1 SV=2                                    | P10630 (+2) | 46 kDa  | 9.80%  | 4  | 1 | 1.0 | 1.5 | 1.4 | 1.5 | 0.01 |
| Eukaryotic translation initiation factor 3 subunit B OS=Mus musculus GN=EIF3B PE=1 SV=2                   | Q8JZQ9      | 91 kDa  | 8.60%  | 4  | 1 | 1.1 | 1.4 | 1.4 | 1.4 | 0.01 |
| Fatty acid-binding protein, adipocyte OS=Mus musculus GN=Fabp4 PE=1 SV=2                                  | P04117      | 15 kDa  | 42.00% | 5  | 1 | 0.9 | 1.0 | 1.2 | 1.2 | 0.34 |
| Fatty acid-binding protein, epidermal OS=Mus musculus GN=Fabp5 PE=1 SV=2                                  | Q05816      | 15 kDa  | 22.00% | 3  | 1 | 0.8 | 1.2 | 1.1 | 1.3 | 0.18 |
| Fatty acid-binding protein, heart OS=Mus musculus GN=Fabp3 PE=1 SV=2                                      | P11404      | 15 kDa  | 59.00% | 9  | 1 | 1.1 | 1.1 | 1.1 | 1.1 | 0.29 |
| Fibrinogen beta chain OS=Mus musculus GN=Fgb PE=2 SV=1                                                    | Q8K0E8      | 55 kDa  | 9.80%  | 3  | 1 | 0.8 | 0.5 | 1.2 | 1.0 | 0.99 |
| Fibrinogen gamma chain OS=Mus musculus GN=Fgg PE=2 SV=1                                                   | Q8VCM7      | 49 kDa  | 7.60%  | 3  | 1 | 0.6 | 0.5 | 1.1 | 1.0 | 0.97 |



|                                                               |             |         |        |    |   |     |     |     |     |      |
|---------------------------------------------------------------|-------------|---------|--------|----|---|-----|-----|-----|-----|------|
| Filamin-C OS=Mus musculus GN=FlnC PE=1 SV=1                   | D3YW87 (+3) | 289 kDa | 8.70%  | 14 | 1 | 0.9 | 1.1 | 1.0 | 1.1 | 0.31 |
| Fission 1 (Mitochondrial outer membrane) homolog (Yeast), iso | G3X9U9 (+1) | 16 kDa  | 25.00% | 3  | 1 | 1.0 | 0.9 | 1.1 | 1.0 | 0.98 |
| Four and a half LIM domains protein 1 OS=Mus musculus GN=Fl   | A2AEX6 (+2) | 35 kDa  | 15.00% | 4  | 1 | 0.6 | 1.0 | 1.1 | 1.3 | 0.37 |
| Four and a half LIM domains protein 2 OS=Mus musculus GN=Fl   | O70433      | 32 kDa  | 12.00% | 3  | 1 | 1.0 | 1.4 | 1.2 | 1.3 | 0.07 |
| Fructose-bisphosphate aldolase A OS=Mus musculus GN=Aldoa     | P05064      | 39 kDa  | 60.00% | 18 | 1 | 0.9 | 1.0 | 1.1 | 1.1 | 0.29 |
| Fumarate hydratase, mitochondrial OS=Mus musculus GN=Fh P     | P97807 (+1) | 54 kDa  | 30.00% | 12 | 1 | 1.0 | 1.1 | 1.2 | 1.2 | 0.20 |
| FUN14 domain-containing protein 2 OS=Mus musculus GN=Fun      | Q9D6K8      | 17 kDa  | 15.00% | 2  | 1 | 0.9 | 0.8 | 1.0 | 0.9 | 0.56 |
| Galectin-1 OS=Mus musculus GN=Lgals1 PE=1 SV=3                | P16045      | 15 kDa  | 39.00% | 4  | 1 | 1.1 | 1.1 | 1.2 | 1.1 | 0.31 |
| Gamma-sarcoglycan OS=Mus musculus GN=Sgcg PE=1 SV=2           | P82348      | 32 kDa  | 7.20%  | 2  | 1 | 1.0 | 1.0 | 1.0 | 1.0 | 0.00 |
| Gap junction alpha-1 protein OS=Mus musculus GN=Gja1 PE=1 S   | P23242      | 43 kDa  | 6.30%  | 2  | 1 | 0.9 | 1.1 | 1.1 | 1.1 | 0.11 |
| Glucose-6-phosphate isomerase OS=Mus musculus GN=Gpi PE=      | P06745      | 63 kDa  | 20.00% | 10 | 1 | 0.9 | 0.9 | 1.1 | 1.1 | 0.58 |
| Glutamate dehydrogenase 1, mitochondrial OS=Mus musculus C    | P26443      | 61 kDa  | 17.00% | 8  | 1 | 0.9 | 0.8 | 1.0 | 1.0 | 0.82 |
| Glutaredoxin-1 OS=Mus musculus GN=Glrx PE=1 SV=3              | Q9QUH0      | 12 kDa  | 18.00% | 2  | 1 | 0.9 | 0.9 | 1.1 | 1.0 | 0.79 |
| Glutaredoxin-related protein 5, mitochondrial OS=Mus musculu  | Q80Y14      | 16 kDa  | 22.00% | 2  | 1 | 0.9 | 0.8 | 0.8 | 0.8 | 0.04 |
| Glutathione S-transferase A4 OS=Mus musculus GN=Gsta4 PE=1    | P24472      | 26 kDa  | 14.00% | 3  | 1 | 1.0 | 1.0 | 1.1 | 1.1 | 0.42 |
| Glutathione S-transferase kappa 1 OS=Mus musculus GN=Gstk1    | Q9DCM2      | 26 kDa  | 27.00% | 5  | 1 | 1.1 | 1.1 | 1.2 | 1.1 | 0.32 |
| Glutathione S-transferase Mu 1 OS=Mus musculus GN=Gstm1 P     | P10649      | 26 kDa  | 50.00% | 11 | 1 | 1.1 | 1.0 | 1.2 | 1.1 | 0.58 |
| Glutathione S-transferase Mu 2 OS=Mus musculus GN=Gstm2 P     | P15626      | 26 kDa  | 37.00% | 5  | 1 | 0.9 | 0.9 | 1.1 | 1.1 | 0.58 |
| Glutathione S-transferase omega-1 OS=Mus musculus GN=Gsto     | O09131      | 27 kDa  | 21.00% | 5  | 1 | 0.9 | 1.1 | 1.1 | 1.2 | 0.03 |
| Glutathione S-transferase P 1 OS=Mus musculus GN=Gstp1 PE=1   | P19157      | 24 kDa  | 30.00% | 4  | 1 | 1.2 | 1.4 | 1.4 | 1.3 | 0.12 |
| Glyceraldehyde-3-phosphate dehydrogenase OS=Mus musculus      | P16858      | 36 kDa  | 44.00% | 13 | 1 | 1.1 | 1.2 | 1.3 | 1.2 | 0.15 |
| Glycerol kinase OS=Mus musculus GN=Gyk PE=3 SV=1              | B1ASZ3 (+3) | 60 kDa  | 3.60%  | 2  | 1 | 1.1 | 1.0 | 1.3 | 1.1 | 0.53 |
| Glycerol-3-phosphate dehydrogenase 1-like protein OS=Mus mu   | Q3ULJ0 (+1) | 38 kDa  | 7.40%  | 2  | 1 | 0.9 | 0.8 | 1.1 | 1.0 | 0.87 |
| Glycine--tRNA ligase OS=Mus musculus GN=Gars PE=1 SV=1        | Q9CZD3      | 82 kDa  | 7.10%  | 4  | 1 | 1.0 | 1.0 | 1.1 | 1.1 | 0.42 |
| Glycogen [starch] synthase, muscle OS=Mus musculus GN=Gys1    | D3Z0Q6 (+1) | 77 kDa  | 9.20%  | 3  | 1 | 0.7 | 0.7 | 1.1 | 1.0 | 0.97 |
| Glycogen phosphorylase, brain form OS=Mus musculus GN=Pyg     | Q8CI94      | 97 kDa  | 22.00% | 11 | 1 | 0.9 | 0.9 | 1.1 | 1.1 | 0.55 |
| Glycogen phosphorylase, muscle form OS=Mus musculus GN=Py     | Q9WUB3      | 97 kDa  | 26.00% | 19 | 1 | 0.9 | 1.0 | 1.1 | 1.1 | 0.29 |
| Glyoxalase domain-containing protein 4 OS=Mus musculus GN=    | E9Q197 (+4) | 31 kDa  | 15.00% | 3  | 1 | 1.1 | 1.1 | 1.2 | 1.1 | 0.32 |

|                                                                |             |         |        |    |   |     |     |     |     |      |
|----------------------------------------------------------------|-------------|---------|--------|----|---|-----|-----|-----|-----|------|
| GrpE protein homolog 1, mitochondrial OS=Mus musculus GN=C     | Q99LP6      | 24 kDa  | 18.00% | 3  | 1 | 1.0 | 0.9 | 1.1 | 1.0 | 0.98 |
| GTP-binding nuclear protein Ran OS=Mus musculus GN=Ran PE=     | P62827      | 24 kDa  | 15.00% | 3  | 1 | 0.9 | 1.0 | 1.1 | 1.1 | 0.32 |
| Guanine nucleotide-binding protein G(i) subunit alpha-2 OS=M   | P08752      | 40 kDa  | 9.00%  | 2  | 1 | 0.8 | 0.7 | 0.8 | 0.8 | 0.31 |
| Guanine nucleotide-binding protein G(s) subunit alpha isoforms | Q6R0H7 (+1) | 122 kDa | 1.70%  | 2  | 1 | 1.1 | 1.1 | 1.1 | 1.0 | 0.98 |
| Guanine nucleotide-binding protein subunit beta-2-like 1 OS=M  | P68040      | 35 kDa  | 5.00%  | 2  | 1 | 0.8 | 1.1 | 1.2 | 1.3 | 0.20 |
| Haptoglobin OS=Mus musculus GN=Hp PE=1 SV=1                    | Q61646      | 39 kDa  | 16.00% | 6  | 1 | 0.3 | 0.2 | 1.4 | 1.3 | 0.83 |
| Heat shock 70 kDa protein 4 OS=Mus musculus GN=Hspa4 PE=1      | Q3U2G2      | 94 kDa  | 21.00% | 11 | 1 | 1.0 | 1.1 | 1.2 | 1.2 | 0.20 |
| Heat shock cognate 71 kDa protein OS=Mus musculus GN=Hspa      | P63017      | 71 kDa  | 48.00% | 25 | 1 | 0.9 | 1.1 | 1.1 | 1.1 | 0.11 |
| Heat shock protein 75 kDa, mitochondrial OS=Mus musculus GN    | Q9CQN1      | 80 kDa  | 6.50%  | 2  | 1 | 0.8 | 1.0 | 1.1 | 1.2 | 0.30 |
| Heat shock protein beta-1 OS=Mus musculus GN=Hspb1 PE=1 S      | P14602 (+1) | 23 kDa  | 43.00% | 8  | 1 | 0.8 | 0.9 | 1.1 | 1.1 | 0.60 |
| Heat shock protein beta-6 OS=Mus musculus GN=Hspb6 PE=2 S      | Q5EBG6      | 18 kDa  | 22.00% | 3  | 1 | 0.7 | 1.1 | 1.1 | 1.3 | 0.29 |
| Heat shock protein beta-7 OS=Mus musculus GN=Hspb7 PE=1 S      | P35385      | 19 kDa  | 24.00% | 3  | 1 | 1.0 | 1.1 | 1.1 | 1.1 | 0.00 |
| Heat shock protein HSP 90-alpha OS=Mus musculus GN=Hsp90a      | P07901      | 85 kDa  | 20.00% | 3  | 1 | 0.8 | 1.0 | 1.2 | 1.3 | 0.29 |
| Heat shock protein HSP 90-beta OS=Mus musculus GN=Hsp90a       | P11499      | 83 kDa  | 36.00% | 22 | 1 | 0.9 | 1.0 | 1.1 | 1.1 | 0.29 |
| Heme oxygenase 2 (Fragment) OS=Mus musculus GN=Hmox2 PE=       | D3YX62 (+1) | 26 kDa  | 12.00% | 2  | 1 | 1.1 | 1.2 | 1.3 | 1.2 | 0.15 |
| Hemoglobin subunit alpha OS=Mus musculus GN=Hba PE=1 SV=       | P01942 (+1) | 15 kDa  | 46.00% | 6  | 1 | 1.1 | 1.0 | 1.1 | 1.0 | 0.69 |
| Hemoglobin subunit beta-1 OS=Mus musculus GN=Hbb-b1 PE=1       | P02088      | 16 kDa  | 83.00% | 5  | 1 | 1.1 | 1.1 | 1.1 | 1.1 | 0.42 |
| Hemoglobin subunit beta-2 OS=Mus musculus GN=Hbb-b2 PE=1       | P02089      | 16 kDa  | 90.00% | 12 | 1 | 1.1 | 1.1 | 1.1 | 1.0 | 0.42 |
| Hemopexin OS=Mus musculus GN=Hpx PE=1 SV=2                     | Q91X72      | 51 kDa  | 34.00% | 14 | 1 | 0.5 | 0.4 | 1.1 | 1.0 | 0.96 |
| Heterogeneous nuclear ribonucleoprotein A/B OS=Mus musculu     | Q20BD0 (+2) | 36 kDa  | 11.00% | 3  | 1 | 1.0 | 1.1 | 1.1 | 1.1 | 0.00 |
| Heterogeneous nuclear ribonucleoprotein A3 OS=Mus musculus     | A2AL12 (+5) | 34 kDa  | 12.00% | 2  | 1 | 0.9 | 1.0 | 1.1 | 1.1 | 0.29 |
| Heterogeneous nuclear ribonucleoprotein H OS=Mus musculus      | O35737 (+1) | 49 kDa  | 7.60%  | 2  | 1 | 0.9 | 1.2 | 1.3 | 1.4 | 0.05 |
| Heterogeneous nuclear ribonucleoprotein K OS=Mus musculus      | B2M1R6 (+6) | 49 kDa  | 16.00% | 5  | 1 | 0.7 | 0.9 | 0.8 | 1.0 | 0.92 |
| Heterogeneous nuclear ribonucleoprotein Q OS=Mus musculus      | G3UXJ6 (+4) | 50 kDa  | 8.00%  | 3  | 1 | 0.8 | 0.9 | 1.1 | 1.1 | 0.47 |
| Heterogeneous nuclear ribonucleoprotein U OS=Mus musculus      | G3XA10 (+1) | 87 kDa  | 4.20%  | 2  | 1 | 1.3 | 1.9 | 1.4 | 1.4 | 0.22 |
| Heterogeneous nuclear ribonucleoproteins A2/B1 OS=Mus mus      | O88569 (+2) | 37 kDa  | 29.00% | 9  | 1 | 1.2 | 1.2 | 1.3 | 1.1 | 0.33 |
| Hexaprenyldihydroxybenzoate methyltransferase, mitochondria    | Q8BMS4      | 41 kDa  | 7.80%  | 2  | 1 | 0.9 | 1.1 | 0.9 | 1.1 | 0.58 |
| Hexokinase 1, isoform CRA_f OS=Mus musculus GN=Hk1 PE=3 S      | G3UVV4 (+4) | 102 kDa | 4.90%  | 3  | 1 | 1.0 | 0.8 | 1.2 | 1.0 | 0.93 |

|                                                                  |             |         |        |    |   |      |      |      |     |      |
|------------------------------------------------------------------|-------------|---------|--------|----|---|------|------|------|-----|------|
| Hexokinase-2 OS=Mus musculus GN=Hk2 PE=3 SV=1                    | E9Q5B5 (+1) | 99 kDa  | 8.90%  | 6  | 1 | 1.0  | 1.4  | 1.5  | 1.5 | 0.01 |
| Histidine rich calcium binding protein, isoform CRA_a OS=Mus n   | G5E8J6      | 85 kDa  | 27.00% | 11 | 1 | 0.8  | 0.8  | 1.0  | 1.0 | 0.88 |
| Histidine triad nucleotide-binding protein 2, mitochondrial OS=M | Q9D0S9      | 17 kDa  | 21.00% | 2  | 1 | 26.0 | 27.9 | 27.9 | 2.1 | 0.37 |
| Histone H1.0 OS=Mus musculus GN=H1f0 PE=2 SV=4                   | P10922      | 21 kDa  | 12.00% | 2  | 1 | 1.0  | 0.9  | 1.1  | 1.0 | 0.98 |
| Histone H1.2 OS=Mus musculus GN=Hist1h1c PE=1 SV=2               | P15864      | 21 kDa  | 23.00% | 4  | 1 | 1.1  | 1.1  | 1.1  | 1.1 | 0.42 |
| Histone H2A OS=Mus musculus GN=Hist1h2a PE=3 SV=1                | F8WIX8 (+9) | 14 kDa  | 28.00% | 3  | 1 | 1.0  | 1.0  | 1.0  | 1.0 | 0.00 |
| Histone H2B type 1-F/J/L OS=Mus musculus GN=Hist1h2bf PE=1       | P10853 (+9) | 14 kDa  | 23.00% | 3  | 1 | 1.1  | 1.1  | 0.9  | 1.0 | 0.71 |
| Histone H3 OS=Mus musculus GN=H3f3a PE=3 SV=1                    | F8WI35 (+4) | 15 kDa  | 9.60%  | 2  | 1 | 1.4  | 1.1  | 1.1  | 0.9 | 0.69 |
| Histone H4 OS=Mus musculus GN=Hist1h4a PE=1 SV=2                 | P62806      | 11 kDa  | 46.00% | 5  | 1 | 1.0  | 0.9  | 0.9  | 0.9 | 0.00 |
| Histone-lysine N-methyltransferase Smyd1 OS=Mus musculus G       | P97443 (+1) | 56 kDa  | 13.00% | 4  | 1 | 1.1  | 1.2  | 1.2  | 1.2 | 0.03 |
| Hydroxyacid-oxoacid transhydrogenase, mitochondrial OS=Mus       | Q8RON6 (+1) | 50 kDa  | 9.90%  | 3  | 1 | 1.1  | 1.1  | 1.3  | 1.1 | 0.49 |
| Hydroxyacyl-coenzyme A dehydrogenase, mitochondrial OS=MU        | Q61425      | 34 kDa  | 13.00% | 5  | 1 | 0.9  | 0.9  | 1.1  | 1.1 | 0.58 |
| Hydroxysteroid dehydrogenase-like protein 2 OS=Mus musculus      | Q2TPA8      | 54 kDa  | 4.50%  | 2  | 1 | 1.0  | 1.1  | 1.0  | 1.0 | 0.42 |
| Inorganic pyrophosphatase 2, mitochondrial OS=Mus musculus       | Q91VM9 (+1) | 38 kDa  | 10.00% | 3  | 1 | 1.6  | 1.7  | 1.9  | 1.4 | 0.26 |
| Inorganic pyrophosphatase OS=Mus musculus GN=Ppa1 PE=1 SV        | Q9D819      | 33 kDa  | 8.70%  | 2  | 1 | 0.9  | 0.9  | 1.1  | 1.1 | 0.58 |
| Integrin beta-1 OS=Mus musculus GN=Itgb1 PE=1 SV=1               | P09055 (+1) | 88 kDa  | 2.60%  | 2  | 1 | 0.8  | 0.8  | 0.9  | 1.0 | 0.79 |
| Inter alpha-trypsin inhibitor, heavy chain 4 OS=Mus musculus G   | A6X935 (+3) | 105 kDa | 1.90%  | 2  | 1 | 0.5  | 0.3  | 1.0  | 0.9 | 0.87 |
| Isobutyryl-CoA dehydrogenase, mitochondrial OS=Mus musculu       | D3YTT4 (+1) | 45 kDa  | 11.00% | 4  | 1 | 1.1  | 1.1  | 1.2  | 1.1 | 0.32 |
| Isocitrate dehydrogenase [NAD] subunit alpha, mitochondrial O    | Q9D6R2      | 40 kDa  | 32.00% | 11 | 1 | 1.0  | 1.0  | 1.1  | 1.1 | 0.42 |
| Isocitrate dehydrogenase [NAD] subunit gamma 1, mitochondria     | P70404      | 43 kDa  | 30.00% | 6  | 1 | 1.4  | 1.2  | 1.5  | 1.1 | 0.58 |
| Isocitrate dehydrogenase [NADP] cytoplasmic OS=Mus musculu       | O88844      | 47 kDa  | 13.00% | 5  | 1 | 1.1  | 1.1  | 1.2  | 1.1 | 0.55 |
| Isocitrate dehydrogenase [NADP], mitochondrial OS=Mus muscu      | P54071      | 51 kDa  | 48.00% | 20 | 1 | 1.1  | 1.1  | 1.3  | 1.2 | 0.34 |
| Isocitrate dehydrogenase 3 (NAD+) beta OS=Mus musculus GN=       | Q91VA7      | 42 kDa  | 28.00% | 9  | 1 | 1.0  | 1.1  | 1.1  | 1.1 | 0.00 |
| Isoform 2 of Dynamin-like 120 kDa protein, mitochondrial OS=M    | P58281-2    | 116 kDa | 10.00% | 9  | 1 | 1.2  | 0.9  | 1.1  | 0.9 | 0.49 |
| Isoform 2 of Myomesin-1 OS=Mus musculus GN=Myom1                 | Q62234-2    | 175 kDa | 26.00% | 34 | 1 | 1.1  | 1.1  | 1.1  | 1.1 | 0.29 |
| Isoform 2 of Probable hydrolase PNKD OS=Mus musculus GN=P        | Q69ZP3-2    | 16 kDa  | 20.00% | 2  | 1 | 0.7  | 1.2  | 1.0  | 1.3 | 0.30 |
| Isoform 2 of Sarcoplasmic/endoplasmic reticulum calcium ATPa     | O55143-2    | 110 kDa | 39.00% | 37 | 1 | 1.1  | 1.1  | 1.1  | 1.0 | 0.71 |
| Isoform 2 of Sorbin and SH3 domain-containing protein 2 OS=M     | Q3UTJ2-2    | 145 kDa | 11.00% | 11 | 1 | 0.8  | 0.9  | 0.9  | 1.0 | 0.74 |

|                                                                                                  |               |         |        |    |   |     |     |     |     |      |
|--------------------------------------------------------------------------------------------------|---------------|---------|--------|----|---|-----|-----|-----|-----|------|
| Isoform 2 of Spectrin beta chain, non-erythrocytic 1 OS=Mus musculus GN=Spectr2 PE=1 SV=1        | Q62261-2      | 251 kDa | 5.80%  | 9  | 1 | 1.1 | 1.0 | 1.0 | 1.0 | 0.42 |
| Isoform 3 of Sarcolemmal membrane-associated protein OS=Mus musculus GN=Sar3 PE=1 SV=1           | Q3URD3-3 (+1) | 42 kDa  | 16.00% | 5  | 1 | 0.9 | 0.9 | 1.1 | 1.1 | 0.49 |
| Isoform M1 of Pyruvate kinase PKM OS=Mus musculus GN=Pkm1 PE=1 SV=1                              | P52480-2      | 58 kDa  | 54.00% | 25 | 1 | 1.0 | 1.1 | 1.2 | 1.2 | 0.04 |
| Isoform Mt-VDAC1 of Voltage-dependent anion-selective channel OS=Mus musculus GN=Vdac1 PE=1 SV=1 | Q60932-2      | 31 kDa  | 65.00% | 13 | 1 | 1.1 | 1.0 | 1.1 | 1.0 | 1.00 |
| Isoform Short of Thymosin beta-4 OS=Mus musculus GN=Tmsb4 PE=1 SV=1                              | P20065-2      | 5 kDa   | 41.00% | 2  | 1 | 1.0 | 1.4 | 1.1 | 1.3 | 0.17 |
| Isovaleryl-CoA dehydrogenase, mitochondrial OS=Mus musculus GN=Ivdh PE=1 SV=1                    | Q9JHI5        | 46 kDa  | 15.00% | 6  | 1 | 1.0 | 0.9 | 1.2 | 1.1 | 0.64 |
| Junction plakoglobin OS=Mus musculus GN=Jup PE=1 SV=3                                            | Q02257        | 82 kDa  | 6.70%  | 3  | 1 | 1.1 | 1.1 | 1.2 | 1.1 | 0.55 |
| Junctophilin-2 OS=Mus musculus GN=Jph2 PE=2 SV=2                                                 | Q9ET78        | 75 kDa  | 11.00% | 4  | 1 | 1.1 | 0.9 | 1.1 | 1.0 | 0.97 |
| Kelch-like protein 41 OS=Mus musculus GN=Klhl41 PE=1 SV=1                                        | A2AUC9        | 68 kDa  | 7.10%  | 4  | 1 | 0.8 | 1.1 | 1.1 | 1.3 | 0.12 |
| Keratin, type I cytoskeletal 10 OS=Mus musculus GN=Krt10 PE=3 SV=1                               | A2A513 (+3)   | 57 kDa  | 3.70%  | 2  | 1 | 0.9 | 0.7 | 0.5 | 0.6 | 0.13 |
| Keratin, type II cytoskeletal 1 OS=Mus musculus GN=Krt1 PE=1 SV=1                                | P04104        | 66 kDa  | 4.90%  | 3  | 1 | 0.5 | 0.4 | 0.4 | 0.5 | 0.26 |
| Kinesin-1 heavy chain OS=Mus musculus GN=Kif5b PE=1 SV=3                                         | Q61768        | 110 kDa | 2.80%  | 2  | 1 | 0.9 | 1.0 | 1.1 | 1.1 | 0.29 |
| Kininogen-1 OS=Mus musculus GN=Kng1 PE=4 SV=1                                                    | D3YTY9 (+3)   | 53 kDa  | 7.30%  | 3  | 1 | 0.8 | 0.7 | 1.0 | 0.9 | 0.79 |
| Lactoylglutathione lyase OS=Mus musculus GN=Glo1 PE=1 SV=3                                       | Q9CPU0        | 21 kDa  | 10.00% | 2  | 1 | 0.9 | 1.1 | 1.2 | 1.2 | 0.17 |
| Laminin subunit alpha-2 OS=Mus musculus GN=Lama2 PE=1 SV=1                                       | Q60675        | 344 kDa | 2.00%  | 5  | 1 | 1.0 | 0.9 | 0.9 | 0.9 | 0.00 |
| Laminin subunit gamma-1 OS=Mus musculus GN=Lamc1 PE=4 SV=1                                       | F8VQJ3 (+1)   | 177 kDa | 2.50%  | 3  | 1 | 1.0 | 1.0 | 1.0 | 1.0 | 0.00 |
| LETM1 and EF-hand domain-containing protein 1, mitochondrial OS=Mus musculus GN=Letm1 PE=1 SV=1  | Q9Z210        | 83 kDa  | 5.80%  | 4  | 1 | 1.1 | 1.0 | 1.1 | 1.0 | 0.69 |
| Leucine-rich PPR motif-containing protein, mitochondrial OS=Mus musculus GN=Lrppr PE=1 SV=1      | Q6PB66        | 157 kDa | 4.90%  | 6  | 1 | 0.9 | 1.0 | 1.0 | 1.0 | 0.42 |
| Leucyl-cystinyl aminopeptidase OS=Mus musculus GN=Lnep PE=1 SV=1                                 | Q8C129        | 117 kDa | 2.60%  | 2  | 1 | 0.8 | 0.8 | 1.1 | 1.0 | 0.84 |
| LIM domain-binding protein 3 OS=Mus musculus GN=Ldb3 PE=1 SV=1                                   | Q9JKS4 (+1)   | 76 kDa  | 30.00% | 15 | 1 | 1.1 | 1.1 | 1.2 | 1.1 | 0.32 |
| L-lactate dehydrogenase B chain OS=Mus musculus GN=Ldhb PE=1 SV=1                                | P16125        | 37 kDa  | 35.00% | 10 | 1 | 1.1 | 1.0 | 1.1 | 1.0 | 0.69 |
| L-lactate dehydrogenase OS=Mus musculus GN=Ldha PE=1 SV=1                                        | G5E8N5 (+1)   | 40 kDa  | 30.00% | 11 | 1 | 0.9 | 1.0 | 1.1 | 1.1 | 0.29 |
| Lon protease homolog, mitochondrial OS=Mus musculus GN=Lon PE=1 SV=1                             | Q8CGK3        | 106 kDa | 5.30%  | 4  | 1 | 1.0 | 1.1 | 1.1 | 1.1 | 0.00 |
| Long-chain specific acyl-CoA dehydrogenase, mitochondrial OS=Mus musculus GN=Lcfa PE=1 SV=1      | P51174        | 48 kDa  | 42.00% | 16 | 1 | 1.0 | 1.1 | 1.2 | 1.2 | 0.20 |
| Long-chain-fatty-acid--CoA ligase 1 OS=Mus musculus GN=Acs11 PE=1 SV=1                           | D3Z041 (+1)   | 78 kDa  | 41.00% | 26 | 1 | 1.0 | 0.9 | 1.1 | 1.0 | 0.98 |
| m7GpppX diphosphatase OS=Mus musculus GN=Dcps PE=1 SV=1                                          | Q9DAR7        | 39 kDa  | 7.70%  | 2  | 1 | 1.1 | 1.4 | 1.1 | 1.2 | 0.46 |
| Macrophage migration inhibitory factor OS=Mus musculus GN=Mif PE=1 SV=1                          | P34884        | 13 kDa  | 17.00% | 2  | 1 | 0.7 | 0.9 | 1.1 | 1.2 | 0.45 |
| Major vault protein OS=Mus musculus GN=Mvp PE=4 SV=1                                             | E9Q3X0 (+1)   | 97 kDa  | 3.30%  | 2  | 1 | 1.4 | 1.4 | 1.7 | 1.3 | 0.30 |

|                                                                |             |         |        |    |   |         |     |     |         |         |
|----------------------------------------------------------------|-------------|---------|--------|----|---|---------|-----|-----|---------|---------|
| Malate dehydrogenase, cytoplasmic OS=Mus musculus GN=Mdl       | P14152      | 37 kDa  | 34.00% | 10 | 1 | 1.1     | 1.1 | 1.3 | 1.1     | 0.29    |
| Malate dehydrogenase, mitochondrial OS=Mus musculus GN=M       | P08249      | 36 kDa  | 63.00% | 19 | 1 | 1.1     | 1.2 | 1.3 | 1.2     | 0.15    |
| Mannose-6-phosphate isomerase OS=Mus musculus GN=Mpi PE        | Q924M7      | 47 kDa  | 11.00% | 3  | 1 | 0.9     | 0.9 | 1.2 | 1.1     | 0.53    |
| MCG10343, isoform CRA_b OS=Mus musculus GN=Slc25a3 PE=1        | G5E902 (+1) | 40 kDa  | 29.00% | 11 | 1 | 1.1     | 1.1 | 1.1 | 1.0     | 0.42    |
| MCG115977 OS=Mus musculus GN=Gm10108 PE=3 SV=1                 | G3UWG1 (+1) | 12 kDa  | 54.00% | 5  | 1 | 0.9     | 0.9 | 1.0 | 1.0     | 0.71    |
| MCG130675 OS=Mus musculus GN=Zbed5 PE=2 SV=1                   | B2RPU8 (+2) | 84 kDa  | 4.90%  | 3  | 1 | 0.8     | 0.9 | 0.8 | 1.0     | 0.79    |
| MCG142036 OS=Mus musculus GN=Acad12 PE=1 SV=1                  | D3Z7X0      | 61 kDa  | 7.90%  | 4  | 1 | 1.1     | 1.0 | 1.2 | 1.1     | 0.58    |
| MCG55033 OS=Mus musculus GN=Gm10250 PE=4 SV=1                  | G3X9L6 (+1) | 19 kDa  | 72.00% | 11 | 1 | 1.1     | 1.0 | 1.1 | 1.0     | 1.00    |
| MCG5603 OS=Mus musculus GN=Ndufa11 PE=4 SV=1                   | G5E814 (+1) | 15 kDa  | 35.00% | 3  | 1 | 1.0     | 0.9 | 1.0 | 1.0     | 0.42    |
| Medium-chain specific acyl-CoA dehydrogenase, mitochondrial    | P45952      | 46 kDa  | 42.00% | 17 | 1 | 1.0     | 1.1 | 1.1 | 1.1     | 0.10    |
| Metaxin-2 OS=Mus musculus GN=Mtx2 PE=1 SV=1                    | O88441      | 30 kDa  | 8.40%  | 2  | 1 | 0.9     | 0.7 | 0.9 | 0.8     | 0.34    |
| Methylglutaconyl-CoA hydratase, mitochondrial (Fragment) OS=   | F6RT60 (+1) | 25 kDa  | 19.00% | 3  | 1 | 1.1     | 0.9 | 1.1 | 1.0     | 0.97    |
| Methylmalonate-semialdehyde dehydrogenase [acylating], mito    | Q9EQ20      | 58 kDa  | 22.00% | 9  | 1 | 1.1     | 1.2 | 1.4 | 1.2     | 0.17    |
| Methylmalonyl-CoA mutase, mitochondrial OS=Mus musculus G      | P16332      | 83 kDa  | 6.60%  | 3  | 1 | 2.3     | 2.6 | 2.8 | 1.7     | 0.24    |
| Microtubule-associated protein OS=Mus musculus GN=Map4 PE      | E9QPW8 (+3) | 114 kDa | 2.50%  | 2  | 1 | #VALUE! | 1.2 | 1.2 | #VALUE! | #VALUE! |
| Mimitin, mitochondrial OS=Mus musculus GN=Ndufa2 PE=2 SV       | Q59J78      | 20 kDa  | 18.00% | 2  | 1 | 1.0     | 1.0 | 0.8 | 0.9     | 0.42    |
| Mitochondrial 2-oxoglutarate/malate carrier protein OS=Mus m   | Q9CR62      | 34 kDa  | 31.00% | 9  | 1 | 1.0     | 0.9 | 1.1 | 1.0     | 0.98    |
| Mitochondrial carnitine/acylcarnitine carrier protein OS=Mus m | Q9Z2Z6      | 33 kDa  | 16.00% | 4  | 1 | 1.0     | 0.9 | 1.1 | 1.0     | 0.80    |
| Mitochondrial carrier homolog 2 OS=Mus musculus GN=Mtch2       | A2AFW6 (+2) | 32 kDa  | 4.80%  | 2  | 1 | 1.0     | 0.9 | 1.1 | 1.0     | 0.74    |
| Mitochondrial fission process protein 1 OS=Mus musculus GN=N   | Q9CRB8      | 18 kDa  | 13.00% | 2  | 1 | 1.0     | 1.0 | 1.0 | 1.0     | 0.00    |
| Mitochondrial import inner membrane translocase subunit Tim    | P62075      | 10 kDa  | 28.00% | 2  | 1 | 1.1     | 1.1 | 1.1 | 1.1     | 0.42    |
| Mitochondrial import receptor subunit TOM22 homolog OS=M       | Q9CPQ3      | 16 kDa  | 37.00% | 3  | 1 | 1.0     | 0.9 | 0.8 | 0.9     | 0.17    |
| Mitochondrial import receptor subunit TOM70 OS=Mus muscul      | Q9CZW5      | 68 kDa  | 2.80%  | 2  | 1 | 1.0     | 1.1 | 0.9 | 1.0     | 0.98    |
| Mitochondrial inner membrane protein OS=Mus musculus GN=I      | E9Q800      | 76 kDa  | 37.00% | 21 | 1 | 1.1     | 0.9 | 1.1 | 1.0     | 0.71    |
| Mitochondrial pyruvate carrier 1 OS=Mus musculus GN=Mpc1 P     | D3YWY6 (+3) | 10 kDa  | 20.00% | 2  | 1 | 1.1     | 1.1 | 1.1 | 1.0     | 0.42    |
| Mitochondrial pyruvate carrier 2 OS=Mus musculus GN=Mpc2 P     | Q9D023      | 14 kDa  | 18.00% | 3  | 1 | 1.1     | 1.0 | 1.1 | 1.0     | 1.00    |
| Moesin OS=Mus musculus GN=Msn PE=1 SV=3                        | P26041      | 68 kDa  | 17.00% | 10 | 1 | 0.9     | 1.1 | 1.1 | 1.1     | 0.11    |
| Monocarboxylate transporter 1 OS=Mus musculus GN=Slc16a1       | P53986      | 53 kDa  | 7.10%  | 3  | 1 | 1.0     | 1.0 | 1.1 | 1.0     | 0.42    |

|                                                                   |             |         |        |    |   |     |     |     |     |      |
|-------------------------------------------------------------------|-------------|---------|--------|----|---|-----|-----|-----|-----|------|
| Murinoglobulin-1 OS=Mus musculus GN=Mug1 PE=1 SV=3                | P28665      | 165 kDa | 1.90%  | 2  | 1 | 1.3 | 1.1 | 1.1 | 0.9 | 0.64 |
| Muscle-related coiled-coil protein OS=Mus musculus GN=Murc        | A2AMM0      | 41 kDa  | 7.50%  | 2  | 1 | 1.2 | 1.2 | 1.5 | 1.2 | 0.29 |
| Myoglobin OS=Mus musculus GN=Mb PE=1 SV=3                         | P04247      | 17 kDa  | 66.00% | 11 | 1 | 1.1 | 1.1 | 1.2 | 1.1 | 0.11 |
| Myomesin 2 OS=Mus musculus GN=Myom2 PE=2 SV=1                     | Q14BI5      | 165 kDa | 31.00% | 36 | 1 | 1.2 | 1.0 | 1.2 | 1.0 | 1.00 |
| Myosin light chain 1/3, skeletal muscle isoform OS=Mus muscul     | E9PWG4      | 18 kDa  | 35.00% | 3  | 1 | 0.7 | 0.7 | 1.0 | 1.0 | 0.93 |
| Myosin light chain 3 OS=Mus musculus GN=Myl3 PE=1 SV=4            | P09542      | 22 kDa  | 75.00% | 12 | 1 | 1.1 | 0.9 | 1.0 | 0.9 | 0.32 |
| Myosin regulatory light chain 2, ventricular/cardiac muscle isofo | P51667      | 19 kDa  | 72.00% | 12 | 1 | 1.0 | 1.0 | 1.1 | 1.0 | 0.42 |
| Myosin-6 OS=Mus musculus GN=Myh6 PE=1 SV=2                        | Q02566      | 224 kDa | 53.00% | 95 | 1 | 1.1 | 0.7 | 0.7 | 0.7 | 0.01 |
| Myosin-7 OS=Mus musculus GN=Myh7 PE=1 SV=1                        | Q91Z83      | 223 kDa | 44.00% | 13 | 1 | 0.7 | 0.7 | 0.9 | 1.0 | 0.85 |
| Myosin-binding protein C, cardiac-type OS=Mus musculus GN=N       | E9Q9T8 (+1) | 141 kDa | 41.00% | 43 | 1 | 1.0 | 0.9 | 0.9 | 0.9 | 0.00 |
| Myotilin OS=Mus musculus GN=Myot PE=1 SV=1                        | Q9JIF9      | 55 kDa  | 4.60%  | 2  | 1 | 0.8 | 0.9 | 1.0 | 1.1 | 0.72 |
| Myozenin-2 OS=Mus musculus GN=Myoz2 PE=1 SV=1                     | Q9JJW5      | 30 kDa  | 51.00% | 9  | 1 | 1.0 | 0.9 | 1.1 | 1.0 | 0.95 |
| Myristoylated alanine-rich C-kinase substrate OS=Mus musculus     | P26645      | 30 kDa  | 26.00% | 4  | 1 | 1.1 | 1.3 | 1.1 | 1.2 | 0.34 |
| NAD(P) transhydrogenase, mitochondrial OS=Mus musculus GN         | Q61941      | 114 kDa | 27.00% | 28 | 1 | 1.1 | 1.0 | 1.1 | 1.0 | 0.69 |
| NAD(P)H-hydrate epimerase OS=Mus musculus GN=Apoa1bp PE           | Q8K4Z3      | 31 kDa  | 9.90%  | 2  | 1 | 0.8 | 0.9 | 0.9 | 1.0 | 0.74 |
| NADH dehydrogenase [ubiquinone] 1 alpha subcomplex subunit        | Q99LC3      | 41 kDa  | 32.00% | 12 | 1 | 1.1 | 1.1 | 1.2 | 1.1 | 0.31 |
| NADH dehydrogenase [ubiquinone] 1 alpha subcomplex subunit        | Q7TMF3      | 17 kDa  | 57.00% | 8  | 1 | 1.0 | 1.1 | 1.1 | 1.1 | 0.00 |
| NADH dehydrogenase [ubiquinone] 1 alpha subcomplex subunit        | Q9ERS2      | 17 kDa  | 32.00% | 4  | 1 | 1.0 | 1.0 | 1.1 | 1.0 | 0.42 |
| NADH dehydrogenase [ubiquinone] 1 alpha subcomplex subunit        | Q9CQ75      | 11 kDa  | 23.00% | 3  | 1 | 1.1 | 1.1 | 1.1 | 1.0 | 0.98 |
| NADH dehydrogenase [ubiquinone] 1 alpha subcomplex subunit        | Q9CQ91      | 9 kDa   | 49.00% | 3  | 1 | 1.2 | 1.1 | 1.1 | 1.0 | 0.97 |
| NADH dehydrogenase [ubiquinone] 1 alpha subcomplex subunit        | Q62425      | 9 kDa   | 56.00% | 6  | 1 | 1.0 | 0.9 | 1.1 | 1.0 | 0.98 |
| NADH dehydrogenase [ubiquinone] 1 alpha subcomplex subunit        | Q9CPP6      | 13 kDa  | 59.00% | 5  | 1 | 1.0 | 1.0 | 1.0 | 1.0 | 0.00 |
| NADH dehydrogenase [ubiquinone] 1 alpha subcomplex subunit        | Q9CQZ5      | 15 kDa  | 37.00% | 5  | 1 | 1.1 | 1.1 | 1.1 | 1.1 | 0.29 |
| NADH dehydrogenase [ubiquinone] 1 alpha subcomplex subunit        | Q9Z1P6      | 13 kDa  | 60.00% | 7  | 1 | 1.1 | 1.1 | 1.1 | 1.0 | 0.42 |
| NADH dehydrogenase [ubiquinone] 1 alpha subcomplex subunit        | Q9DCJ5      | 20 kDa  | 43.00% | 7  | 1 | 0.9 | 1.0 | 1.0 | 1.1 | 0.42 |
| NADH dehydrogenase [ubiquinone] 1 alpha subcomplex subunit        | Q9DC69      | 43 kDa  | 33.00% | 12 | 1 | 1.0 | 1.0 | 1.1 | 1.0 | 0.42 |
| NADH dehydrogenase [ubiquinone] 1 beta subcomplex subunit         | Q9DCS9      | 21 kDa  | 51.00% | 8  | 1 | 1.0 | 1.1 | 1.1 | 1.1 | 0.10 |
| NADH dehydrogenase [ubiquinone] 1 beta subcomplex subunit         | O09111      | 17 kDa  | 44.00% | 4  | 1 | 1.1 | 1.0 | 0.9 | 0.9 | 0.29 |

|                                                               |             |         |        |    |   |     |     |     |     |      |
|---------------------------------------------------------------|-------------|---------|--------|----|---|-----|-----|-----|-----|------|
| NADH dehydrogenase [ubiquinone] 1 beta subcomplex subunit     | Q9CQC7      | 15 kDa  | 33.00% | 3  | 1 | 1.1 | 1.7 | 1.5 | 1.6 | 0.04 |
| NADH dehydrogenase [ubiquinone] 1 beta subcomplex subunit     | Q9CQH3      | 22 kDa  | 28.00% | 5  | 1 | 1.1 | 1.0 | 1.1 | 1.0 | 1.00 |
| NADH dehydrogenase [ubiquinone] 1 beta subcomplex subunit     | A2AP32 (+1) | 12 kDa  | 41.00% | 4  | 1 | 1.1 | 1.0 | 1.1 | 1.0 | 1.00 |
| NADH dehydrogenase [ubiquinone] 1 beta subcomplex subunit     | Q9CR61      | 16 kDa  | 64.00% | 6  | 1 | 1.3 | 1.1 | 1.3 | 1.1 | 0.72 |
| NADH dehydrogenase [ubiquinone] 1 beta subcomplex subunit     | Q9D6J5      | 22 kDa  | 38.00% | 5  | 1 | 0.9 | 0.9 | 0.9 | 1.0 | 0.42 |
| NADH dehydrogenase [ubiquinone] 1 beta subcomplex subunit     | Q9CQJ8      | 22 kDa  | 39.00% | 7  | 1 | 1.1 | 1.1 | 1.1 | 1.0 | 0.42 |
| NADH dehydrogenase [ubiquinone] 1 subunit C2 OS=Mus muscu     | Q9CQ54      | 14 kDa  | 24.00% | 3  | 1 | 1.1 | 1.1 | 1.1 | 1.1 | 0.29 |
| NADH dehydrogenase [ubiquinone] flavoprotein 1, mitochondri   | D3YUM1 (+1) | 50 kDa  | 33.00% | 13 | 1 | 1.1 | 1.0 | 1.1 | 1.0 | 1.00 |
| NADH dehydrogenase [ubiquinone] flavoprotein 2, mitochondri   | Q9D6J6      | 27 kDa  | 40.00% | 7  | 1 | 1.1 | 1.1 | 1.1 | 1.0 | 0.98 |
| NADH dehydrogenase [ubiquinone] flavoprotein 3, mitochondri   | Q8BK30      | 12 kDa  | 17.00% | 2  | 1 | 0.9 | 0.9 | 0.8 | 0.9 | 0.31 |
| NADH dehydrogenase [ubiquinone] iron-sulfur protein 2, mitoch | Q91WD5      | 53 kDa  | 31.00% | 12 | 1 | 1.1 | 1.0 | 1.1 | 1.0 | 1.00 |
| NADH dehydrogenase [ubiquinone] iron-sulfur protein 3, mitoch | Q9DCT2      | 30 kDa  | 25.00% | 7  | 1 | 1.1 | 1.0 | 1.1 | 1.0 | 1.00 |
| NADH dehydrogenase [ubiquinone] iron-sulfur protein 4, mitoch | E9QPX3 (+1) | 20 kDa  | 31.00% | 5  | 1 | 1.0 | 1.0 | 1.1 | 1.0 | 0.42 |
| NADH dehydrogenase [ubiquinone] iron-sulfur protein 5 OS=Mu   | Q99LY9      | 13 kDa  | 38.00% | 4  | 1 | 1.2 | 1.1 | 1.1 | 1.0 | 0.97 |
| NADH dehydrogenase [ubiquinone] iron-sulfur protein 6, mitoch | P52503      | 13 kDa  | 34.00% | 3  | 1 | 1.1 | 1.1 | 1.1 | 1.0 | 0.42 |
| NADH dehydrogenase [ubiquinone] iron-sulfur protein 7, mitoch | Q9DC70      | 25 kDa  | 17.00% | 4  | 1 | 1.0 | 0.9 | 1.1 | 1.0 | 0.98 |
| NADH dehydrogenase [ubiquinone] iron-sulfur protein 8, mitoch | Q8K3J1      | 24 kDa  | 17.00% | 4  | 1 | 1.0 | 1.0 | 0.9 | 1.0 | 0.42 |
| NADH-ubiquinone oxidoreductase 75 kDa subunit, mitochondria   | Q91VD9      | 80 kDa  | 39.00% | 23 | 1 | 1.1 | 1.1 | 1.1 | 1.0 | 0.71 |
| NADH-ubiquinone oxidoreductase chain 1 OS=Mus musculus GN     | P03888      | 36 kDa  | 5.70%  | 2  | 1 | 1.1 | 1.1 | 1.1 | 1.1 | 0.29 |
| NADH-ubiquinone oxidoreductase chain 3 OS=Mus musculus GN     | P03899 (+1) | 13 kDa  | 18.00% | 2  | 1 | 0.7 | 0.8 | 1.1 | 1.1 | 0.75 |
| NADH-ubiquinone oxidoreductase chain 4 OS=Mus musculus GN     | P03911 (+1) | 52 kDa  | 6.30%  | 3  | 1 | 1.1 | 1.2 | 1.1 | 1.1 | 0.31 |
| NADP-dependent malic enzyme, mitochondrial OS=Mus musculu     | Q8BMF3      | 67 kDa  | 6.10%  | 3  | 1 | 1.0 | 0.9 | 1.3 | 1.1 | 0.71 |
| Nascent polypeptide-associated complex subunit alpha, muscle- | P70670      | 220 kDa | 6.60%  | 8  | 1 | 0.8 | 0.9 | 0.9 | 1.1 | 0.70 |
| Nebulette OS=Mus musculus GN=Nebi PE=4 SV=1                   | B7ZC12      | 116 kDa | 9.30%  | 7  | 1 | 1.1 | 1.1 | 1.2 | 1.1 | 0.31 |
| Nebulin-related-anchoring protein OS=Mus musculus GN=Nrap     | E9PZF4 (+3) | 192 kDa | 2.00%  | 3  | 1 | 0.6 | 1.0 | 1.0 | 1.2 | 0.42 |
| NEDD8-conjugating enzyme Ubc12 (Fragment) OS=Mus musculu      | F6WMC0 (+2) | 20 kDa  | 13.00% | 2  | 1 | 0.9 | 1.1 | 1.1 | 1.2 | 0.15 |
| Neutral cholesterol ester hydrolase 1 OS=Mus musculus GN=Nc   | Q8BLF1      | 46 kDa  | 16.00% | 6  | 1 | 0.9 | 0.9 | 1.1 | 1.0 | 0.69 |
| Nicotinamide phosphoribosyltransferase OS=Mus musculus GN=    | Q99KQ4      | 55 kDa  | 10.00% | 4  | 1 | 1.2 | 1.1 | 1.5 | 1.2 | 0.42 |

|                                                                                        |             |         |        |    |   |         |         |         |         |         |
|----------------------------------------------------------------------------------------|-------------|---------|--------|----|---|---------|---------|---------|---------|---------|
| Nidogen-1 OS=Mus musculus GN=Nid1 PE=1 SV=2                                            | P10493      | 137 kDa | 5.10%  | 6  | 1 | 1.0     | 0.8     | 1.0     | 0.9     | 0.42    |
| Non-specific lipid-transfer protein OS=Mus musculus GN=Scp2 PE=1 SV=1                  | P32020 (+1) | 59 kDa  | 5.50%  | 3  | 1 | 0.9     | 0.8     | 1.1     | 1.0     | 0.94    |
| NSFL1 cofactor p47 OS=Mus musculus GN=Nsf1c PE=1 SV=1                                  | Q9CZ44 (+2) | 41 kDa  | 8.40%  | 2  | 1 | 1.3     | 1.1     | 1.0     | 0.9     | 0.53    |
| Nuclease-sensitive element-binding protein 1 OS=Mus musculus GN=Nse1 PE=1 SV=1         | P62960      | 36 kDa  | 34.00% | 7  | 1 | 0.8     | 0.9     | 1.1     | 1.1     | 0.50    |
| Nucleolar protein 3 OS=Mus musculus GN=Nol3 PE=1 SV=1                                  | Q9D1X0      | 25 kDa  | 17.00% | 2  | 1 | 0.5     | 0.5     | 0.4     | 0.7     | 0.46    |
| Nucleophosmin OS=Mus musculus GN=Npm1 PE=1 SV=1                                        | Q5SQB0 (+3) | 30 kDa  | 6.40%  | 2  | 1 | 0.9     | 1.1     | 1.1     | 1.2     | 0.03    |
| Nucleoside diphosphate kinase OS=Mus musculus GN=Gm20390 PE=1 SV=1                     | E9PZF0 (+1) | 30 kDa  | 31.00% | 8  | 1 | 0.9     | 1.1     | 1.1     | 1.1     | 0.09    |
| O-acetyl-ADP-ribose deacetylase MACROD1 OS=Mus musculus GN=Macrod1 PE=1 SV=1           | Q922B1      | 35 kDa  | 9.30%  | 2  | 1 | 0.9     | 0.9     | 1.1     | 1.0     | 0.69    |
| Obscurin OS=Mus musculus GN=Obscn PE=2 SV=2                                            | A2AAJ9 (+4) | 966 kDa | 1.20%  | 7  | 1 | 0.9     | 1.1     | 1.1     | 1.1     | 0.11    |
| OCIA domain-containing protein 1 OS=Mus musculus GN=Ociad1 PE=1 SV=1                   | Q9CRD0 (+2) | 28 kDa  | 14.00% | 2  | 1 | 1.1     | 1.1     | 0.9     | 0.9     | 0.61    |
| Omega-amidase NIT2 OS=Mus musculus GN=Nit2 PE=1 SV=1                                   | Q9JHW2      | 31 kDa  | 9.40%  | 2  | 1 | 1.2     | 1.2     | 1.4     | 1.2     | 0.30    |
| Ornithine aminotransferase, mitochondrial OS=Mus musculus GN=Ornat1 PE=1 SV=1          | P29758      | 48 kDa  | 12.00% | 5  | 1 | 0.9     | 0.9     | 1.1     | 1.0     | 0.79    |
| Parathymosin OS=Mus musculus GN=Ptms PE=1 SV=3                                         | Q9D0J8      | 11 kDa  | 12.00% | 2  | 1 | #VALUE! | #VALUE! | #VALUE! | #VALUE! | #VALUE! |
| PDZ and LIM domain protein 1 OS=Mus musculus GN=Pdlim1 PE=1 SV=1                       | O70400      | 36 kDa  | 8.60%  | 3  | 1 | 1.0     | 1.3     | 1.6     | 1.5     | 0.09    |
| PDZ and LIM domain protein 5 OS=Mus musculus GN=Pdlim5 PE=1 SV=1                       | E9Q8P5 (+2) | 26 kDa  | 46.00% | 7  | 1 | 1.1     | 1.0     | 1.1     | 1.0     | 1.00    |
| Peptidyl-prolyl cis-trans isomerase A OS=Mus musculus GN=Ppi1 PE=1 SV=1                | P17742      | 18 kDa  | 35.00% | 5  | 1 | 1.1     | 1.3     | 1.2     | 1.2     | 0.15    |
| Peptidyl-prolyl cis-trans isomerase F, mitochondrial OS=Mus musculus GN=Ppi2 PE=1 SV=1 | Q99KR7      | 22 kDa  | 20.00% | 3  | 1 | 1.1     | 1.0     | 1.0     | 0.9     | 0.42    |
| Peptidyl-prolyl cis-trans isomerase FKBP1A OS=Mus musculus GN=Ppi3 PE=1 SV=1           | P26883      | 12 kDa  | 25.00% | 2  | 1 | 1.0     | 1.1     | 1.2     | 1.2     | 0.04    |
| Perilipin-3 OS=Mus musculus GN=Plin3 PE=1 SV=1                                         | Q9DBG5      | 47 kDa  | 5.90%  | 2  | 1 | 0.9     | 0.7     | 0.9     | 0.8     | 0.35    |
| Peroxiredoxin-1 (Fragment) OS=Mus musculus GN=Prdx1 PE=1 SV=1                          | B1AXW5 (+2) | 19 kDa  | 44.00% | 8  | 1 | 1.1     | 1.1     | 1.2     | 1.1     | 0.11    |
| Peroxiredoxin-2 OS=Mus musculus GN=Prdx2 PE=1 SV=3                                     | Q61171      | 22 kDa  | 40.00% | 8  | 1 | 1.2     | 1.3     | 1.3     | 1.2     | 0.22    |
| Peroxiredoxin-5, mitochondrial OS=Mus musculus GN=Prdx5 PE=1 SV=1                      | P99029 (+1) | 22 kDa  | 45.00% | 9  | 1 | 1.1     | 1.1     | 1.2     | 1.1     | 0.11    |
| Peroxiredoxin-6 OS=Mus musculus GN=Prdx6 PE=1 SV=3                                     | O08709 (+1) | 25 kDa  | 36.00% | 6  | 1 | 1.2     | 1.2     | 1.3     | 1.1     | 0.33    |
| Peroxisomal acyl-coenzyme A oxidase 1 OS=Mus musculus GN=Aox1 PE=1 SV=1                | Q9R0H0 (+1) | 75 kDa  | 5.40%  | 2  | 1 | 0.8     | 0.9     | 1.4     | 1.3     | 0.39    |
| Phosphatidylethanolamine-binding protein 1 OS=Mus musculus GN=PEBP1 PE=1 SV=1          | P70296      | 21 kDa  | 37.00% | 4  | 1 | 1.1     | 1.1     | 1.4     | 1.2     | 0.46    |
| Phosphoglucomutase-1 OS=Mus musculus GN=Pgm1 PE=1 SV=4                                 | Q9D0F9      | 61 kDa  | 30.00% | 14 | 1 | 1.0     | 1.0     | 1.1     | 1.1     | 0.42    |
| Phosphoglucomutase-like protein 5 OS=Mus musculus GN=Pgm5 PE=1 SV=1                    | Q8BZF8      | 62 kDa  | 6.00%  | 2  | 1 | 1.1     | 0.8     | 0.9     | 0.8     | 0.18    |
| Phosphoglycerate kinase 1 OS=Mus musculus GN=Pgk1 PE=1 SV=1                            | P09411      | 45 kDa  | 30.00% | 11 | 1 | 1.1     | 1.1     | 1.1     | 1.1     | 0.29    |



|                                                                |              |         |        |   |   |     |     |     |     |      |
|----------------------------------------------------------------|--------------|---------|--------|---|---|-----|-----|-----|-----|------|
| Phosphoglycerate mutase 1 OS=Mus musculus GN=Pgam1 PE=1        | Q9DBJ1       | 29 kDa  | 22.00% | 2 | 1 | 0.9 | 1.1 | 0.9 | 1.0 | 0.79 |
| Phosphoglycerate mutase 2 OS=Mus musculus GN=Pgam2 PE=1        | O70250       | 29 kDa  | 35.00% | 8 | 1 | 1.0 | 1.1 | 1.1 | 1.1 | 0.10 |
| Phospholipid hydroperoxide glutathione peroxidase, mitochond   | O70325 (+3)  | 22 kDa  | 12.00% | 2 | 1 | 0.9 | 0.9 | 0.9 | 1.0 | 0.42 |
| Platelet glycoprotein 4 OS=Mus musculus GN=Cd36 PE=1 SV=2      | Q08857       | 53 kDa  | 12.00% | 6 | 1 | 1.0 | 0.9 | 1.1 | 1.0 | 0.74 |
| Plectin OS=Mus musculus GN=Plec PE=1 SV=1                      | E9Q3W4 (+16) | 499 kDa | 1.50%  | 4 | 1 | 1.0 | 1.1 | 1.1 | 1.1 | 0.00 |
| Polymerase delta-interacting protein 2 (Fragment) OS=Mus mus   | F6SQH7 (+1)  | 33 kDa  | 6.70%  | 2 | 1 | 0.9 | 1.1 | 1.0 | 1.1 | 0.32 |
| Polymerase I and transcript release factor OS=Mus musculus GN  | O54724       | 44 kDa  | 20.00% | 5 | 1 | 1.1 | 0.9 | 1.1 | 1.0 | 0.97 |
| Polyubiquitin-C (Fragment) OS=Mus musculus GN=Ubc PE=4 SV=     | E9Q5F6 (+6)  | 23 kDa  | 24.00% | 5 | 1 | 1.3 | 1.4 | 1.5 | 1.3 | 0.21 |
| Prelamin-A/C OS=Mus musculus GN=Lmna PE=1 SV=2                 | P48678 (+2)  | 74 kDa  | 2.90%  | 2 | 1 | 1.0 | 1.0 | 1.2 | 1.1 | 0.42 |
| Probable C->U-editing enzyme APOBEC-2 OS=Mus musculus GN       | Q9WV35       | 26 kDa  | 14.00% | 2 | 1 | 1.3 | 1.1 | 1.2 | 1.0 | 0.97 |
| Profilin-1 OS=Mus musculus GN=Pfn1 PE=1 SV=2                   | P62962 (+1)  | 15 kDa  | 31.00% | 3 | 1 | 1.4 | 1.6 | 1.7 | 1.4 | 0.16 |
| Prohibitin OS=Mus musculus GN=Phb PE=1 SV=1                    | P67778       | 30 kDa  | 33.00% | 8 | 1 | 1.1 | 1.0 | 1.1 | 1.0 | 1.00 |
| Prohibitin-2 OS=Mus musculus GN=Phb2 PE=1 SV=1                 | O35129       | 33 kDa  | 29.00% | 8 | 1 | 1.1 | 0.9 | 1.1 | 1.0 | 0.71 |
| Prolyl endopeptidase OS=Mus musculus GN=Prep PE=2 SV=1         | Q9QUR6       | 81 kDa  | 3.50%  | 2 | 1 | 0.8 | 1.0 | 1.1 | 1.2 | 0.30 |
| Propionyl-CoA carboxylase alpha chain, mitochondrial OS=Mus    | Q91ZA3       | 80 kDa  | 13.00% | 7 | 1 | 1.0 | 1.1 | 1.1 | 1.1 | 0.10 |
| Propionyl-CoA carboxylase beta chain, mitochondrial OS=Mus m   | Q99MN9       | 58 kDa  | 21.00% | 8 | 1 | 1.0 | 1.1 | 1.1 | 1.1 | 0.10 |
| Prostaglandin E synthase 2 OS=Mus musculus GN=Ptges2 PE=1 S    | Q8BWM0       | 43 kDa  | 6.00%  | 2 | 1 | 0.9 | 1.0 | 0.9 | 1.0 | 1.00 |
| Proteasome activator complex subunit 1 OS=Mus musculus GN=     | G3UXY0 (+3)  | 26 kDa  | 11.00% | 2 | 1 | 0.7 | 1.1 | 1.1 | 1.3 | 0.27 |
| Proteasome subunit alpha type-1 OS=Mus musculus GN=Pma1        | Q9R1P4       | 30 kDa  | 13.00% | 3 | 1 | 0.9 | 1.0 | 1.1 | 1.1 | 0.32 |
| Proteasome subunit alpha type-3 OS=Mus musculus GN=Pma3        | O70435       | 28 kDa  | 11.00% | 2 | 1 | 0.9 | 0.9 | 1.1 | 1.0 | 0.79 |
| Proteasome subunit alpha type-6 OS=Mus musculus GN=Pma6        | Q9QUM9       | 27 kDa  | 8.50%  | 2 | 1 | 1.3 | 1.4 | 1.4 | 1.2 | 0.25 |
| Protein 5430421N21Rik OS=Mus musculus GN=5430421N21Rik         | E9Q1Y9 (+2)  | 53 kDa  | 4.00%  | 2 | 1 | 0.2 | 0.1 | 0.1 | 0.2 | 0.38 |
| Protein ADP-ribosylarginine] hydrolase-like protein 1 OS=Mus m | Q8BGK2       | 40 kDa  | 20.00% | 6 | 1 | 1.2 | 1.1 | 1.4 | 1.1 | 0.45 |
| Protein Agl OS=Mus musculus GN=Agl PE=4 SV=1                   | F8VFN4       | 174 kDa | 6.00%  | 8 | 1 | 0.8 | 0.9 | 1.1 | 1.1 | 0.45 |
| Protein Ahnak OS=Mus musculus GN=Ahnak PE=1 SV=1               | E9Q616       | 604 kDa | 0.51%  | 2 | 1 | 1.0 | 0.9 | 0.8 | 0.9 | 0.17 |
| Protein disulfide-isomerase A3 OS=Mus musculus GN=Pdia3 PE=    | P27773       | 57 kDa  | 6.50%  | 3 | 1 | 0.9 | 1.1 | 1.0 | 1.1 | 0.31 |
| Protein disulfide-isomerase OS=Mus musculus GN=P4hb PE=1 S     | P09103       | 57 kDa  | 6.10%  | 2 | 1 | 0.8 | 0.8 | 0.9 | 0.9 | 0.49 |
| Protein FAM162A OS=Mus musculus GN=Fam162a PE=2 SV=1           | Q9D6U8       | 18 kDa  | 24.00% | 3 | 1 | 1.1 | 1.0 | 1.1 | 1.0 | 0.69 |

|                                                                 |             |         |        |    |   |         |         |         |         |         |
|-----------------------------------------------------------------|-------------|---------|--------|----|---|---------|---------|---------|---------|---------|
| Protein Fga OS=Mus musculus GN=Fga PE=4 SV=1                    | E9PV24 (+1) | 87 kDa  | 9.80%  | 6  | 1 | 0.8     | 0.8     | 1.1     | 1.1     | 0.78    |
| Protein kinase C and casein kinase substrate in neurons protein | Q9WVE8      | 56 kDa  | 6.80%  | 3  | 1 | 0.9     | 0.9     | 0.8     | 0.9     | 0.11    |
| Protein kinase, cAMP dependent regulatory, type II alpha OS=M   | Q8K1M3      | 46 kDa  | 7.00%  | 2  | 1 | 1.1     | 1.2     | 1.3     | 1.2     | 0.15    |
| Protein Lmo7 OS=Mus musculus GN=Lmo7 PE=1 SV=1                  | E9PYF4 (+3) | 193 kDa | 2.00%  | 2  | 1 | 1.0     | 1.0     | 1.1     | 1.1     | 0.42    |
| Protein NDRG2 OS=Mus musculus GN=Ndr2 PE=1 SV=1                 | Q9QYG0 (+1) | 41 kDa  | 19.00% | 5  | 1 | 1.1     | 1.1     | 1.2     | 1.1     | 0.31    |
| Protein NipSnap homolog 2 OS=Mus musculus GN=Gbas PE=2 SV=1     | O55126 (+1) | 33 kDa  | 22.00% | 7  | 1 | 1.1     | 1.1     | 1.2     | 1.1     | 0.32    |
| Protein Ogdhl OS=Mus musculus GN=Ogdhl PE=4 SV=1                | E9Q7L0      | 117 kDa | 21.00% | 11 | 1 | 1.2     | 1.1     | 1.4     | 1.1     | 0.45    |
| Protein Prob1 (Fragment) OS=Mus musculus GN=Prob1 PE=1 SV=1     | Q3UKG2      | 106 kDa | 2.40%  | 2  | 1 | 2.1     | 2.5     | 2.3     | 1.5     | 0.30    |
| Protein QIL1 OS=Mus musculus GN=Qil1 PE=2 SV=1                  | Q8R404      | 13 kDa  | 24.00% | 2  | 1 | 1.1     | 0.9     | 1.1     | 1.0     | 0.97    |
| Protein S100-A1 OS=Mus musculus GN=S100a1 PE=1 SV=2             | P56565 (+1) | 11 kDa  | 30.00% | 2  | 1 | 1.1     | 1.0     | 1.2     | 1.1     | 0.58    |
| Protein Tns1 OS=Mus musculus GN=Tns1 PE=1 SV=1                  | E9Q0S6      | 201 kDa | 1.70%  | 2  | 1 | 0.9     | 1.0     | 1.0     | 1.1     | 0.42    |
| Protein transport protein Sec23A OS=Mus musculus GN=Sec23a      | E9Q1S3 (+1) | 83 kDa  | 2.60%  | 2  | 1 | 1.0     | 1.0     | 1.1     | 1.1     | 0.42    |
| Protein-cysteine N-palmitoyltransferase HHAT-like protein OS=N  | Q9D1G3      | 56 kDa  | 3.20%  | 2  | 1 | 1.1     | 1.1     | 1.1     | 1.0     | 0.71    |
| Protein-glutamine gamma-glutamyltransferase 2 OS=Mus muscu      | P21981      | 77 kDa  | 7.60%  | 4  | 1 | 1.2     | 1.3     | 1.5     | 1.3     | 0.18    |
| Puromycin-sensitive aminopeptidase OS=Mus musculus GN=Np        | E9Q039 (+2) | 100 kDa | 2.40%  | 2  | 1 | 1.1     | 1.1     | 1.2     | 1.1     | 0.31    |
| Pyruvate dehydrogenase (acetyl-transferring)] kinase isozyme 1  | Q8BFP9      | 49 kDa  | 15.00% | 5  | 1 | 1.1     | 1.2     | 1.3     | 1.2     | 0.05    |
| Pyruvate dehydrogenase (acetyl-transferring)] kinase isozyme 2  | Q9JK42      | 46 kDa  | 6.40%  | 2  | 1 | 1.1     | 0.9     | 1.1     | 1.0     | 0.97    |
| Pyruvate dehydrogenase E1 component subunit alpha, somatic      | P35486      | 43 kDa  | 27.00% | 12 | 1 | 1.1     | 1.0     | 1.1     | 1.0     | 0.69    |
| Pyruvate dehydrogenase E1 component subunit beta, mitochon      | Q9D051      | 39 kDa  | 28.00% | 9  | 1 | 1.0     | 1.0     | 1.1     | 1.0     | 0.42    |
| Pyruvate dehydrogenase protein X component, mitochondrial C     | Q8BKZ9      | 54 kDa  | 22.00% | 7  | 1 | 1.1     | 1.1     | 1.3     | 1.1     | 0.49    |
| Rab GDP dissociation inhibitor beta OS=Mus musculus GN=Gdi2     | Q61598 (+1) | 51 kDa  | 16.00% | 5  | 1 | 0.9     | 1.0     | 1.1     | 1.1     | 0.32    |
| Ras-related protein Rab-14 OS=Mus musculus GN=Rab14 PE=1 SV=1   | Q91V41      | 24 kDa  | 23.00% | 2  | 1 | 1.1     | 1.2     | 1.1     | 1.1     | 0.31    |
| Ras-related protein Rab-1A OS=Mus musculus GN=Rab1 PE=3 SV=1    | Q5SW88      | 22 kDa  | 26.00% | 5  | 1 | 1.0     | 1.0     | 1.0     | 1.0     | 0.00    |
| Ras-related protein Rab-7a OS=Mus musculus GN=Rab7a PE=1 SV=1   | P51150      | 23 kDa  | 23.00% | 4  | 1 | 0.8     | 0.9     | 1.1     | 1.2     | 0.42    |
| Reticulon-4-interacting protein 1, mitochondrial OS=Mus muscu   | Q924D0      | 43 kDa  | 6.30%  | 3  | 1 | 1.1     | 1.1     | 1.1     | 1.1     | 0.09    |
| Rho GDP-dissociation inhibitor 1 OS=Mus musculus GN=Arhgdia     | Q99PT1      | 23 kDa  | 15.00% | 2  | 1 | #VALUE! | #VALUE! | #VALUE! | #VALUE! | #VALUE! |
| Ryanodine receptor 2 OS=Mus musculus GN=Ryr2 PE=1 SV=1          | E9Q401 (+1) | 565 kDa | 4.00%  | 16 | 1 | 1.1     | 1.0     | 1.0     | 1.0     | 0.42    |
| Sarcalumenin OS=Mus musculus GN=Srl PE=1 SV=1                   | Q7TQ48      | 99 kDa  | 28.00% | 20 | 1 | 1.1     | 1.1     | 1.2     | 1.1     | 0.11    |

|                                                                 |             |         |        |    |   |         |         |         |         |         |
|-----------------------------------------------------------------|-------------|---------|--------|----|---|---------|---------|---------|---------|---------|
| Selenium-binding protein 1 OS=Mus musculus GN=Selenbp1 PE=      | P17563      | 53 kDa  | 13.00% | 5  | 1 | 1.1     | 1.1     | 1.2     | 1.1     | 0.31    |
| Sepiapterin reductase OS=Mus musculus GN=Spr PE=4 SV=1          | G3UXX3 (+3) | 23 kDa  | 12.00% | 2  | 1 | 1.2     | 0.9     | 1.4     | 1.0     | 0.94    |
| Septin-7 OS=Mus musculus GN=Sept7 PE=1 SV=2                     | E9Q1G8 (+2) | 51 kDa  | 8.90%  | 3  | 1 | 0.8     | 0.8     | 1.0     | 1.0     | 1.00    |
| Serine protease inhibitor A3K OS=Mus musculus GN=Serpina3k      | P07759      | 47 kDa  | 30.00% | 9  | 1 | 2.0     | 1.7     | 1.3     | 1.0     | 0.96    |
| Serine/threonine-protein phosphatase 2A catalytic subunit beta  | P62715 (+1) | 36 kDa  | 10.00% | 2  | 1 | #VALUE! | #VALUE! | #VALUE! | #VALUE! | #VALUE! |
| Serine/threonine-protein phosphatase PP1-alpha catalytic subu   | P62137 (+3) | 38 kDa  | 9.70%  | 3  | 1 | 0.9     | 0.9     | 1.0     | 1.0     | 1.00    |
| Serotransferrin OS=Mus musculus GN=Tf PE=1 SV=1                 | Q92111      | 77 kDa  | 43.00% | 27 | 1 | 0.8     | 0.8     | 1.1     | 1.1     | 0.74    |
| Serpin B6 OS=Mus musculus GN=Serpib6a PE=1 SV=1                 | F8WIV2 (+1) | 45 kDa  | 17.00% | 6  | 1 | 1.0     | 1.1     | 1.3     | 1.2     | 0.11    |
| Serum albumin OS=Mus musculus GN=Alb PE=1 SV=3                  | P07724      | 69 kDa  | 50.00% | 30 | 1 | 1.3     | 1.4     | 1.0     | 1.0     | 0.87    |
| Serum deprivation-response protein OS=Mus musculus GN=Sdp       | Q63918      | 47 kDa  | 13.00% | 3  | 1 | 1.1     | 1.1     | 1.1     | 1.1     | 0.29    |
| SH3 domain-binding glutamic acid-rich protein (Fragment) OS=N   | F7CKA6 (+1) | 10 kDa  | 42.00% | 4  | 1 | 1.1     | 1.1     | 1.2     | 1.1     | 0.11    |
| Short-chain specific acyl-CoA dehydrogenase, mitochondrial OS=  | Q07417      | 45 kDa  | 32.00% | 10 | 1 | 1.0     | 1.1     | 1.2     | 1.2     | 0.04    |
| Small nuclear ribonucleoprotein Sm D3 OS=Mus musculus GN=S      | P62320      | 14 kDa  | 15.00% | 2  | 1 | 0.9     | 1.1     | 1.1     | 1.1     | 0.09    |
| Sodium/calcium exchanger 1 OS=Mus musculus GN=Slc8a1 PE=4       | G3X9J1 (+1) | 108 kDa | 7.30%  | 5  | 1 | 0.9     | 0.9     | 0.9     | 1.0     | 0.42    |
| Sodium/potassium-transporting ATPase subunit alpha-1 OS=Mus     | Q8VDN2      | 113 kDa | 24.00% | 20 | 1 | 1.1     | 0.9     | 1.1     | 1.0     | 0.71    |
| Sodium/potassium-transporting ATPase subunit beta-1 OS=Mus      | P14094      | 35 kDa  | 18.00% | 4  | 1 | 1.1     | 1.0     | 0.9     | 0.9     | 0.29    |
| Sorbin and SH3 domain-containing protein 1 OS=Mus musculus      | E9QNA7 (+2) | 83 kDa  | 21.00% | 10 | 1 | 0.9     | 1.1     | 1.0     | 1.1     | 0.29    |
| Sorting and assembly machinery component 50 homolog OS=M        | Q8BGH2      | 52 kDa  | 27.00% | 10 | 1 | 1.0     | 0.9     | 1.1     | 1.0     | 0.98    |
| Spectrin alpha chain, non-erythrocytic 1 OS=Mus musculus GN=    | A3KGU5 (+4) | 283 kDa | 9.80%  | 20 | 1 | 0.9     | 1.0     | 1.1     | 1.1     | 0.29    |
| S-phase kinase-associated protein 1 OS=Mus musculus GN=Skp1     | Q9WTX5      | 19 kDa  | 22.00% | 3  | 1 | 0.9     | 1.1     | 1.2     | 1.2     | 0.17    |
| Stress-70 protein, mitochondrial OS=Mus musculus GN=Hspa9 F     | P38647      | 73 kDa  | 33.00% | 19 | 1 | 1.0     | 1.0     | 1.1     | 1.1     | 0.42    |
| Stress-induced-phosphoprotein 1 OS=Mus musculus GN=Stip1 P      | Q60864      | 63 kDa  | 4.80%  | 2  | 1 | 0.9     | 0.9     | 0.9     | 1.0     | 0.69    |
| Striated muscle-specific serine/threonine-protein kinase OS=Mus | E9QQ25 (+1) | 354 kDa | 0.95%  | 2  | 1 | #VALUE! | #VALUE! | #VALUE! | #VALUE! | #VALUE! |
| Succinate dehydrogenase [ubiquinone] flavoprotein subunit, mi   | Q8K2B3      | 73 kDa  | 37.00% | 18 | 1 | 1.1     | 1.0     | 1.1     | 1.0     | 0.69    |
| Succinate dehydrogenase [ubiquinone] iron-sulfur subunit, mito  | Q9CQA3      | 32 kDa  | 32.00% | 10 | 1 | 1.0     | 0.9     | 1.1     | 1.0     | 0.98    |
| Succinate dehydrogenase cytochrome b560 subunit, mitochond      | Q9CZB0      | 18 kDa  | 17.00% | 2  | 1 | 1.1     | 1.0     | 1.0     | 1.0     | 0.42    |
| Succinate-semialdehyde dehydrogenase, mitochondrial OS=Mus      | Q8BWF0      | 56 kDa  | 3.40%  | 2  | 1 | 1.0     | 1.0     | 0.9     | 0.9     | 0.42    |
| Succinyl-CoA ligase [ADP/GDP-forming] subunit alpha, mitochor   | Q9WUM5      | 36 kDa  | 25.00% | 7  | 1 | 1.1     | 1.1     | 1.3     | 1.1     | 0.49    |

|                                                                 |             |          |        |     |   |     |     |     |     |      |
|-----------------------------------------------------------------|-------------|----------|--------|-----|---|-----|-----|-----|-----|------|
| Succinyl-CoA ligase [ADP-forming] subunit beta, mitochondrial C | Q9Z2I9      | 50 kDa   | 43.00% | 18  | 1 | 1.1 | 1.1 | 1.2 | 1.1 | 0.11 |
| Succinyl-CoA ligase [GDP-forming] subunit beta, mitochondrial C | Q9Z2I8 (+1) | 47 kDa   | 17.00% | 7   | 1 | 1.0 | 1.0 | 1.1 | 1.1 | 0.42 |
| Succinyl-CoA:3-ketoacid coenzyme A transferase 1, mitochondri   | Q9D0K2      | 56 kDa   | 21.00% | 8   | 1 | 1.4 | 1.5 | 1.5 | 1.3 | 0.27 |
| Superoxide dismutase [Cu-Zn] OS=Mus musculus GN=Sod1 PE=1       | P08228      | 16 kDa   | 14.00% | 2   | 1 | 1.2 | 1.1 | 1.2 | 1.1 | 0.61 |
| Superoxide dismutase [Mn], mitochondrial OS=Mus musculus G      | P09671      | 25 kDa   | 38.00% | 7   | 1 | 1.0 | 1.0 | 1.4 | 1.2 | 0.42 |
| Synaptopodin 2-like protein OS=Mus musculus GN=Synpo2l PE=      | B2RQK7 (+2) | 103 kDa  | 6.90%  | 4   | 1 | 0.9 | 1.1 | 1.2 | 1.2 | 0.05 |
| T-complex protein 1 subunit alpha OS=Mus musculus GN=Tcp1       | P11983 (+1) | 60 kDa   | 7.90%  | 4   | 1 | 0.9 | 1.0 | 1.1 | 1.1 | 0.29 |
| T-complex protein 1 subunit gamma OS=Mus musculus GN=Cct3       | P80318 (+1) | 61 kDa   | 3.90%  | 2   | 1 | 0.8 | 0.9 | 0.9 | 1.0 | 0.80 |
| Thioredoxin OS=Mus musculus GN=Txn PE=1 SV=3                    | P10639      | 12 kDa   | 30.00% | 3   | 1 | 1.0 | 1.4 | 1.4 | 1.4 | 0.00 |
| Thioredoxin-dependent peroxide reductase, mitochondrial OS=     | P20108      | 28 kDa   | 25.00% | 4   | 1 | 1.2 | 1.3 | 1.4 | 1.2 | 0.18 |
| Thioredoxin-like protein 1 OS=Mus musculus GN=Txnl1 PE=2 SV     | Q8CDN6      | 32 kDa   | 17.00% | 3   | 1 | 0.8 | 1.1 | 1.1 | 1.2 | 0.22 |
| Titin OS=Mus musculus GN=Ttn PE=1 SV=1                          | A2ASS6      | 3906 kDa | 13.00% | 374 | 1 | 1.1 | 1.1 | 1.2 | 1.1 | 0.31 |
| Transaldolase OS=Mus musculus GN=Taldo1 PE=1 SV=2               | Q93092      | 37 kDa   | 7.10%  | 2   | 1 | 1.5 | 1.4 | 1.5 | 1.2 | 0.51 |
| Transforming protein RhoA OS=Mus musculus GN=Rhoa PE=1 SV       | Q9QUI0      | 22 kDa   | 14.00% | 2   | 1 | 0.9 | 0.9 | 1.1 | 1.1 | 0.58 |
| Transgelin-2 OS=Mus musculus GN=Tagln2 PE=1 SV=4                | Q9WVA4      | 22 kDa   | 25.00% | 4   | 1 | 1.1 | 1.1 | 1.1 | 1.1 | 0.29 |
| Transitional endoplasmic reticulum ATPase OS=Mus musculus G     | Q01853      | 89 kDa   | 20.00% | 11  | 1 | 1.0 | 1.1 | 0.9 | 1.0 | 0.98 |
| Translational activator of cytochrome c oxidase 1 OS=Mus musc   | Q8K0Z7      | 32 kDa   | 9.90%  | 2   | 1 | 2.8 | 2.6 | 2.6 | 1.4 | 0.51 |
| Translationally-controlled tumor protein OS=Mus musculus GN=    | P63028      | 19 kDa   | 22.00% | 3   | 1 | 0.9 | 1.1 | 1.1 | 1.1 | 0.17 |
| Trifunctional enzyme subunit alpha, mitochondrial OS=Mus mus    | Q8BMS1      | 83 kDa   | 41.00% | 26  | 1 | 1.1 | 1.1 | 1.1 | 1.1 | 0.29 |
| Trifunctional enzyme subunit beta, mitochondrial OS=Mus musc    | Q99JY0      | 51 kDa   | 33.00% | 13  | 1 | 1.1 | 1.0 | 1.2 | 1.1 | 0.58 |
| Triosephosphate isomerase OS=Mus musculus GN=Tpi1 PE=1 SV       | P17751      | 32 kDa   | 38.00% | 11  | 1 | 1.0 | 1.1 | 1.2 | 1.2 | 0.20 |
| Tripartite motif-containing protein 72 OS=Mus musculus GN=Tri   | Q1XH17      | 53 kDa   | 33.00% | 11  | 1 | 0.9 | 1.0 | 1.0 | 1.1 | 0.42 |
| Tropomyosin alpha-1 chain OS=Mus musculus GN=Tpm1 PE=1 S        | P58771      | 33 kDa   | 57.00% | 17  | 1 | 1.1 | 1.0 | 1.0 | 1.0 | 0.42 |
| Tropomyosin alpha-4 chain OS=Mus musculus GN=Tpm4 PE=2 S        | Q6IRU2      | 28 kDa   | 17.00% | 2   | 1 | 0.7 | 1.0 | 1.1 | 1.2 | 0.35 |
| Troponin C, slow skeletal and cardiac muscles OS=Mus musculus   | P19123      | 18 kDa   | 24.00% | 5   | 1 | 1.1 | 0.9 | 1.1 | 0.9 | 0.55 |
| Troponin I, cardiac muscle OS=Mus musculus GN=Tnni3 PE=1 SV     | P48787      | 24 kDa   | 46.00% | 10  | 1 | 1.0 | 0.9 | 0.9 | 0.9 | 0.09 |
| Troponin T, cardiac muscle OS=Mus musculus GN=Tnnt2 PE=4 S      | J3QQ13 (+7) | 36 kDa   | 33.00% | 10  | 1 | 1.1 | 0.9 | 1.0 | 0.9 | 0.29 |
| Tubulin alpha-1B chain OS=Mus musculus GN=Tuba1b PE=1 SV=       | P05213      | 50 kDa   | 29.00% | 3   | 1 | 0.9 | 1.1 | 1.1 | 1.1 | 0.09 |

|                                                               |             |         |        |    |   |     |     |     |     |      |
|---------------------------------------------------------------|-------------|---------|--------|----|---|-----|-----|-----|-----|------|
| Tubulin alpha-4A chain OS=Mus musculus GN=Tuba4a PE=1 SV=     | P68368      | 50 kDa  | 29.00% | 11 | 1 | 0.9 | 1.1 | 1.1 | 1.2 | 0.03 |
| Tubulin beta-2A chain OS=Mus musculus GN=Tubb2a PE=1 SV=1     | Q7TMM9      | 50 kDa  | 31.00% | 2  | 1 | 0.9 | 1.1 | 1.1 | 1.2 | 0.15 |
| Tubulin beta-4B chain OS=Mus musculus GN=Tubb4b PE=1 SV=1     | P68372      | 50 kDa  | 37.00% | 12 | 1 | 1.0 | 1.1 | 1.1 | 1.1 | 0.00 |
| Ubiquinone biosynthesis protein COQ7 homolog OS=Mus muscu     | P97478      | 24 kDa  | 29.00% | 5  | 1 | 1.3 | 1.2 | 1.3 | 1.1 | 0.56 |
| Ubiquinone biosynthesis protein COQ9, mitochondrial OS=Mus    | Q8K1Z0      | 35 kDa  | 19.00% | 4  | 1 | 1.1 | 1.1 | 1.2 | 1.1 | 0.32 |
| Ubiquitin carboxyl-terminal hydrolase 5 OS=Mus musculus GN=   | P56399 (+1) | 96 kDa  | 6.50%  | 4  | 1 | 1.0 | 1.0 | 1.1 | 1.0 | 0.42 |
| Ubiquitin thioesterase OTUB1 OS=Mus musculus GN=Otub1 PE=     | D3YWF6 (+1) | 28 kDa  | 11.00% | 2  | 1 | 1.1 | 1.2 | 1.2 | 1.1 | 0.17 |
| Ubiquitin-conjugating enzyme E2 N OS=Mus musculus GN=Ube2     | P61089      | 17 kDa  | 14.00% | 2  | 1 | 0.9 | 1.1 | 1.4 | 1.3 | 0.25 |
| Ubiquitin-like modifier-activating enzyme 1 OS=Mus musculus G | Q02053      | 118 kDa | 9.20%  | 7  | 1 | 1.1 | 1.1 | 1.2 | 1.1 | 0.32 |
| Uncharacterized protein OS=Mus musculus GN=Gm10260 PE=3       | F6YVP7 (+2) | 18 kDa  | 11.00% | 2  | 1 | 1.1 | 1.1 | 1.2 | 1.1 | 0.11 |
| Uncharacterized protein OS=Mus musculus GN=Gm6576 PE=3 S      | F6YTZ4 (+4) | 30 kDa  | 8.40%  | 2  | 1 | 0.9 | 1.2 | 1.0 | 1.2 | 0.34 |
| Uncharacterized protein OS=Mus musculus GN=Gm7729 PE=4 S      | J3QK72 (+2) | 34 kDa  | 10.00% | 2  | 1 | 1.4 | 1.3 | 1.3 | 1.1 | 0.64 |
| UPF0598 protein C8orf82 homolog OS=Mus musculus PE=2 SV=      | Q8VE95      | 24 kDa  | 14.00% | 2  | 1 | 1.3 | 1.2 | 1.4 | 1.1 | 0.47 |
| Up-regulated during skeletal muscle growth protein 5 OS=Mus r | Q78IK2      | 6 kDa   | 43.00% | 2  | 1 | 1.1 | 1.0 | 1.1 | 1.0 | 1.00 |
| UTP--glucose-1-phosphate uridylyltransferase OS=Mus musculu   | Q91ZJ5 (+1) | 57 kDa  | 14.00% | 6  | 1 | 0.8 | 0.8 | 0.9 | 1.0 | 0.79 |
| Vacuolar protein sorting-associated protein 35 OS=Mus musculu | Q9EQH3      | 92 kDa  | 2.80%  | 2  | 1 | 1.0 | 1.0 | 1.3 | 1.2 | 0.42 |
| Very long-chain specific acyl-CoA dehydrogenase, mitochondria | P50544      | 71 kDa  | 53.00% | 26 | 1 | 1.0 | 0.9 | 1.1 | 1.0 | 0.74 |
| Vimentin OS=Mus musculus GN=Vim PE=1 SV=3                     | P20152      | 54 kDa  | 33.00% | 11 | 1 | 0.9 | 1.3 | 1.1 | 1.3 | 0.10 |
| Vinculin OS=Mus musculus GN=Vcl PE=1 SV=4                     | Q64727      | 117 kDa | 16.00% | 13 | 1 | 1.1 | 1.0 | 1.1 | 1.0 | 1.00 |
| Voltage-dependent anion-selective channel protein 2 (Fragment | G3UX26 (+1) | 30 kDa  | 36.00% | 8  | 1 | 1.1 | 0.9 | 1.0 | 0.9 | 0.29 |
| Voltage-dependent anion-selective channel protein 3 OS=Mus n  | J3QMG3 (+1) | 31 kDa  | 49.00% | 10 | 1 | 1.1 | 1.1 | 1.1 | 1.1 | 0.29 |
| von Willebrand factor A domain-containing protein 8 OS=Mus m  | Q8CC88 (+1) | 213 kDa | 1.60%  | 2  | 1 | 1.1 | 1.1 | 1.1 | 1.0 | 0.42 |
| WD repeat-containing protein 1 OS=Mus musculus GN=Wdr1 PE     | O88342      | 66 kDa  | 20.00% | 7  | 1 | 1.0 | 1.2 | 1.1 | 1.2 | 0.04 |
| Wolframín OS=Mus musculus GN=Wfs1 PE=1 SV=1                   | P56695 (+1) | 101 kDa | 2.20%  | 2  | 1 | 0.8 | 0.9 | 1.0 | 1.0 | 0.82 |
| Xin actin-binding repeat-containing protein 1 OS=Mus musculus | E9QQ93 (+1) | 124 kDa | 19.00% | 14 | 1 | 0.7 | 1.0 | 1.0 | 1.2 | 0.42 |
